19

20 **Abstract**

21

22 *Dionysia tapetodes*, a small cushion-forming mountainous evergreen in the Primulaceae,

23 possesses a vast surface-covering of long silky fibres forming the characteristic “wooly”

24 farina. This contrasts with some related *Primula* which instead possess a powdery farina.

25 Using a combination of cell biology and analytical chemical techniques, we provide a

26 detailed insight of wooly farina formation by glandular trichomes that produce a mixture of

27 flavone and substituted flavone derivatives, including hydroxyflavones. Conversely, our

28 analysis show that the powdery form consist almost entirely of flavone . The wooly farina in

29 *D. tapetodes* is extruded through specific sites at the surface of the glandular head cell,

30 characterised by a small complete gap in the plasma membrane, cell wall and cuticle. The

31 data is consistent with formation and thread elongation occurring from within the cell. The

32 putative mechanism of wool thread formation and its stability is discussed.

33

34

35 **Keywords**

36

37 Cell wall, *Dionysia*, farina, flavone, glandular trichome, hydroxyflavone, *Primula*, vacuole,  
38 wool

39

40

## 41 Introduction

42

43 The genus *Dionysia* contains 55 species, found across central Asia. They are very closely  
44 related to *Primula* and some species have historically moved backwards and forwards  
45 between the two genera (Lidén 2007). Under the Angiosperm Phylogeny Project, *Dionysia*  
46 has been subsumed into *Primula* (<https://www.mobot.org>). However, the current  
47 Missouri/Kew “Plant list”, a working list of all plant species, still recognises *Dionysia* as a  
48 genus in its own right (<http://www.theplantlist.org>). Species of *Dionysia* are dwarf shrubs or  
49 woody perennials forming loose to densely compact cushions with terminal inflorescences.  
50 They grow at high altitude in mountain regions usually on limestone cliffs although granite,  
51 sandstone and dolomitic sites have also been recorded and are found in shaded or semi  
52 shaded conditions. *Dionysia tapetodes* (Bunge 1871) is the most widely distributed *Dionysia*  
53 with a range from the Kopet Dagh through NE Iran (mountains of Khorasan Province) to the  
54 mountains of Afghanistan (Grey-Wilson 1989). This wide range helps to explain the variation  
55 within the species. They form large, rather flat cushions with yellow flowers in the wild and in  
56 cultivation (Beckett *et al.* 1993).

57 For some species of *Primula* and *Dionysia*, a mealy deposit termed farina (latin “meal” or  
58 “flour”) is found to cover all or a subset of aerial parts of the plant. It is readily observed, for  
59 example on the leaf surface, either as a powder or, in some *Dionysia* species, as fine thread  
60 (or wool)-like fibres that are commonly referred to as “wooly farina”. Like *Primula*, in *Dionysia*  
61 both farinose and efarinose forms can exist within the same species. The powdery farina of  
62 *Primula* species is mostly comprised of 2-phenyl-4H-chromen-4-one, more commonly known  
63 as flavone (Müller 1915; Blasdale 1945). Chemical analysis of solvent-rinsed plant organs  
64 reveal a growing number of additional substituted flavones, particularly hydroxy- and  
65 methoxy- derivatives. The number of different flavone types can be extensive and their  
66 presence/absence can vary between closely-related species (Valant-Vetschera *et al.* 2009,  
67 2010; Bhutia *et al.* 2013; Hinterdobler *et al.* 2017). Given these flavone assignments  
68 represent total surface-extracted flavones that include different tissue/cell types, it is not  
69 clear which substituted flavones actually constitute the farina of a given species.

70 Farina biosynthesis takes place in glandular trichomes that typically consist of a stalk  
71 attached to a single round cell known as the glandular head (Fico *et al.* 2007; Vitalini *et al.*  
72 2011; Bhutia and Valant-Vetschera 2012). The crystals of powdery farina are seen to coat  
73 the head cell and, at the subcellular level, a proliferation of smooth ER is observed  
74 suggesting a site of synthesis and transport of some biosynthetic intermediates  
75 (Wollenweber and Schnepf 1970; Gunning and Steer 1996). Part of the biosynthetic  
76 pathway to flavones is known but for synthesis of more complex derivatives is less well  
77 understood (Jiang *et al.* 2016). Chalcone synthase (CHS) represents the first step in the

78 flavonoid biosynthetic pathway and immunolocalization of the enzyme in farinose *Primula*  
79 *kewensis* shows high signal in the gland head cell (but not in an *efarinose* mutant),  
80 suggesting the full flavone farina biosynthetic machinery is present in this cell (Schopker *et*  
81 *al.* 1995). Furthermore, immunogold labelling showed enrichment of CHS in spherical bodies  
82 in the cytoplasm. As flavone farina biosynthesis continues, the subcellular locations of  
83 intermediates and final products are not known. Generally, flavone glycones, being soluble,  
84 can accumulate in the vacuole (Marinova *et al.* 2007) but, for farina producing plants, the  
85 storage location of the insoluble aglycone is not well understood, possibly being localised to  
86 a modified vacuole-type organelle that can stretch across the cell (van Brederode and  
87 Steyns 1985). These flavone and flavone-type aglycones need to be transported out of the  
88 cell and through the cell wall and cuticle for deposition on the surface of the hair cell.  
89 Presumably this becomes more complicated for wooly farina whereby the flavone building  
90 blocks need to be concentrated to a single exit site to produce an elongating fibre.  
91 We present here our results showing wooly farina composition and the subcellular  
92 organisation of the glandular trichome head cell that is the site of farina synthesis in *D.*  
93 *tapetodes*. We identify the wool as a mixture that includes flavone and hydroxyflavones that  
94 emerge from the head cell and is threaded through distinct gaps in the cell wall and cuticle.  
95 The mechanism of wool formation is discussed.

96

## 97 **Materials and Methods**

98

### 99 Plant propagation and harvesting.

100

101 We used *Dionysia tapetodes* accession 20140435 that was received from the Royal Botanic  
102 Garden Edinburgh (accession 19822508) comprising wild material collected by Prof. T.F.  
103 Hewer (number 1164) between 1969 and 1971. *D. tapetodes* was grown at Cambridge  
104 University Botanic Garden (Cambridge, UK) in clay pots plunged in sand in an alpine house  
105 to keep the roots cooler and at a more stable temperature. The potting compost comprised  
106 50% loam-based compost, 30% 1-9mm grit, 10% sharp sand, 10% seramis and a small  
107 amount of slow release fertiliser. The compost is top-dressed with grit which is carefully  
108 worked under the collar of the plant to reduce the risks of basal rot. Given that *Dionysia* are  
109 prone to rosette burning from overexposure to sunlight, a temporary shading screen was  
110 placed over the collection from mid-March and removed later in the season after sun  
111 intensity decreased. Old flowers were carefully removed to prevent any botrytis infection  
112 moving from dead flowers into living material. Watering adhered to a strict regime: Young  
113 plants were watered from underneath via a water bath and once they passed one year old

114 were then watered overhead without getting the cushion surface wet. Water was applied  
115 sparingly in the winter months and increased once the plants were in active growth.

116

#### 117 Cryo-Scanning Electron Microscopy (cryoSEM) and cryo-fracture.

118

119 Rosettes of 5-8 leaves were mounted, frozen in nitrogen slush, platinum coated and  
120 fractured as previously described (Wightman *et al.* 2018). To accommodate better fractures  
121 without dislodging trichomes, some samples were dipped in 70% v/v ethanol to remove the  
122 wool and then air-dried prior to freezing. Cryo prepared samples were viewed using a Zeiss  
123 EVO HD SEM fitted with a backscattered electron detector and 25 kV acceleration voltage.

124

#### 125 Low kV SEM imaging of wool fibres.

126

127 Clumps of uncoated wool fibres were placed on a sticky carbon tab and mounted on an SEM  
128 stub in the Zeiss EVO HD SEM at high vacuum and 1kV accelerating voltage using SE  
129 detector fast scanning with frame averaging to prevent wool movement.

130

#### 131 Embedding, sectioning and imaging of trichomes by transmission electron microscopy 132 (TEM) and light (epifluorescence) microscopy.

133

134 Leaves were dissected with razor blades in a solution consisting of 4% formaldehyde  
135 (freshly prepared from paraformaldehyde powder, Sigma) and 0.5% glutaraldehyde (Sigma)  
136 in PBS buffer. Fixation, dehydration, resin infiltration and antibodies washing steps were all  
137 microwave (MW) assisted using a PELCO BioWave Pro (Ted Pella). Fixation was realized at  
138 150W, under vacuum (20Hg) (5x 1min). Samples were left in the fixative overnight at 4°C  
139 and then washed 3 times in PBS. Stems were then parallelly aligned and embedded in 1%  
140 agarose in PBS. Samples were then processed through increasing dehydration steps (25%,  
141 50%, 70%, 90%, 96%, 3x 100% ethanol, vacuum 20Hg, MW 150W 5min), and left overnight  
142 in 100% ethanol at 4°C. Resin infiltration (LR White medium grade, Agar scientific) was then  
143 realized through increasing resin concentration: 33% Resin in ethanol 100%, 66% Resin in  
144 ethanol 100%, and 3 times 100% Resin (20Hg, MW 200W 5min). Samples were left at least  
145 24h in 100% resin for effective penetration in the samples. Resin polymerization was  
146 subsequently realized at 60°C during 18h.

147 For epifluorescence microscopy, semi-thin sections (1µm) of the whole leaf bud were then  
148 obtained with a Leica EM UC7 ultramicrotome using a Histo Jumbo 8mm diamond knife  
149 (DiATOME) and laid on droplets of sterile water on uncoated glass microscopy slides. In  
150 order to avoid folds on sections during the water drying process, slides were dried on a hot

151 plate at 55°C (Leica). Slides were finally mounted in a 1:1 solution of AF1 antifadent  
152 (Citifluor) with PBS, containing calcofluor as a cell wall counterstaining, and imaged by  
153 confocal laser scanning microscopy (Zeiss LSM700).

154 For TEM observations, 100nm thin sections were obtained with a Leica EM UC7  
155 ultramicrotome using an ultra 45° diamond knife (DiATOME) and deposited on 200-300µm  
156 mesh formvar-coated nickel grids

157 Samples were post-stained using Reynold's lead citrate and uranyl acetate for 3 min in  
158 each. Thin sections were viewed in a FEI/Thermofisher Tecnai G20 electron microscope run  
159 at 200 keV with a 20 µm objective aperture to improve contrast. Images were taken with an  
160 AMT camera running DEBEN software.

161

### 162 Field Emission Scanning Electron Microscopy (FE-SEM) of leaf sections.

163

164 Whole rosettes were dissected with razor blades to remove apical parts of leaves and  
165 immediately submerged in fixative (2 % glutaraldehyde/2 % formaldehyde in 0.05 M sodium  
166 cacodylate buffer pH 7.4 containing 2 mM calcium chloride) under vacuum overnight at room  
167 temperature. After washing 5x in DIW (deionised water), samples were osmicated (1 %  
168 osmium tetroxide, 1.5 % potassium ferricyanide in 0.05 M sodium cacodylate buffer pH 7.4)  
169 for 3 days at 4°C. Then samples were washed 5x with DIW and treated with 0.1 % (w/v)  
170 thiocarbonylhydrazide/DIW for 20 minutes at room temperature in the dark. After washing 5x in  
171 DIW, samples were osmicated a second time for 1 hour at RT (2% osmium tetroxide/DIW).  
172 After washing 5x in DIW, samples were blockstained with uranyl acetate (2 % uranyl acetate  
173 in 0.05 M maleate buffer pH 5.5) for 3 days at 4°C. Samples were washed 5x in DIW and  
174 then dehydrated in a graded series of ethanol (50%/70%/95%/100%/100% dry) 100% dry  
175 acetone and 100% dry acetonitrile, 3x in each for at least 5 min. Samples were infiltrated  
176 with a 50/50 mixture of 100% dry acetonitrile/Quetol resin (without BDMA) overnight,  
177 followed by 3 days in 100% Quetol (without BDMA). Then, the sample was infiltrated for 5  
178 days in 100% Quetol resin with BDMA, exchanging the resin each day. The Quetol resin  
179 mixture is: 12 g Quetol 651, 15.7 g NSA, 5.7 g MNA and 0.5 g BDMA (all from TAAB).  
180 Samples were placed in embedding moulds and cured at 60°C for 3 days. Semi-thin  
181 sections (1µm) of the whole leaf bud were then obtained with a Leica EM UC7  
182 ultramicrotome using a Histo-Jumbo 8mm diamond knife (DiATOME) and laid on droplets of  
183 sterile water on uncoated glass microscopy slides. In order to avoid folds on sections during  
184 the water drying process, slides were dried on a hot plate at 55°C (Leica). Glass slides were  
185 then resized with a glass knifemaker to be mounted on aluminium SEM stubs using  
186 conductive carbon tabs, and the edges of the slides were painted with conductive silver  
187 paint. Samples were sputter coated with 30 nm carbon using a Quorum Q150 TE carbon

188 coater. Samples were imaged in a Verios 460 scanning electron microscope  
189 (FEI/ThermoFisher) at 4 keV accelerating voltage and 0.2 nA probe current in backscatter  
190 mode using the concentric backscatter detector (CBS) in immersion mode at a working  
191 distance of 3.5-4 mm; 1536 x 1024 pixel resolution, 3  $\mu$ s dwell time, 4 line integrations.  
192 Stitched maps were acquired using FEI MAPS software using the default stitching profile  
193 and 10% image overlap.

194

#### 195 Measurements of wool fibre diameter.

196

197 Images of wool fibres, attached to leaves of an isolated *D. tapetodes* rosette, were taken  
198 with a Keyence VHX-7000 microscope at 2500x magnification and illuminated with full field  
199 coaxial light. 2D depth-up mode was used for in-focus acquisitions. Fibre width  
200 measurements were carried out using the point-to-point measuring tool in the Keyence  
201 software.

202

#### 203 Raman microscopy of farina.

204

205 Raman microscopy was carried out on a Renishaw InVia instrument equipped with a 785 nm  
206 laser. *D. tapetodes* farina wool or *P. marginata* powder was carefully placed on a quartz  
207 slide and brought in to focus under a 50x dry objective lens. Raman acquisitions used a  
208 1200 l/mm grating, 1200  $\text{cm}^{-1}$  centre, 785 nm laser at 10% power, regular confocal mode  
209 and 4 s exposure with 3 accumulations. At least 3 spectra per sample were averaged in  
210 order to improve signal-to-noise. To find close matches with reference Raman spectra, the  
211 experimental spectra were used as a search input against the Raman databases, that  
212 include some flavone derivatives, in the KnowItAll software (Bio-Rad Inc.) using the  
213 "SearchIT" tool and then candidate spectra were visualised by eye to remove false positives.  
214 Both default and Euclidean distance search settings were used. Matches are ranked  
215 according to their hit quality index (out of a maximum of 100). *P. marginata* farina gave a  
216 close match (97/100) with flavone. *D. tapetodes* gave no close matches but yielded good  
217 correlation (70-80/100) to reference spectra of hydroxy- and methoxy- flavone derivatives  
218 that included 7, 2'-dimethoxyflavone; 3,7-dimethoxyflavone and 6-, 7-, or 8- hydroxy-  
219 derivatives. For fastFLIM-Raman correlative imaging of leaves submerged in water  
220 (Supplementary data Fig. S9) a confocal-Raman microscope, described in (Wightman *et al.*  
221 2019), used the following settings: 25x 0.95 NA water dipping objective lens, FLIM 440 nm  
222 pulsed laser (at 20 MHz) with detector window set between 448 nm and 511 nm and 80  
223 iterations. Raman: 1200 l/mm grating, 1200  $\text{cm}^{-1}$  centre, 785 nm laser, 50% power, 15 s

224 exposure with 2 accumulations used in line scan mode that intersected a glandular head  
225 cell.

226

#### 227 Reagents, solvents and sample preparation for chemical analysis.

228

229 Pure Flavone was purchased from Alfa Aesar as a white solid with 99% purity (CAS no. 525-  
230 82-6, catalogue no. A13627) and used without further purification. All solvents were anhydrous  
231 and used as purchased without any further purification. Flavone wool from was picked from  
232 *D. tapetodes* leaf surfaces using fine tweezers and placed in a microcentrifuge tube. The wool  
233 sample (approximately 0.5 mg) was dissolved in 50  $\mu$ L of acetonitrile/water (1:1) with a few  
234 drops of dimethylsulfoxide (DMSO) to aid solubility. Sample preparation was performed in this  
235 way for analytical HPLC, LCMS and HRMS analysis.

236

#### 237 Analytical high-performance liquid chromatography (HPLC)

238

239 Analytical HPLC was run on an Agilent 1260 Infinity using a Supelcosil ABZ+PLUS column  
240 (150 mm  $\times$  4.6 mm, 3  $\mu$ m) eluting with a linear gradient system (solvent A: 0.05% (v/v)  
241 trifluoroacetic acid (TFA) in H<sub>2</sub>O, solvent B: 0.05% (v/v) TFA in acetonitrile (MeCN)) over 15  
242 min at a flow rate of 1 mL/min.

243

#### 244 Liquid chromatography mass spectrometry (LCMS)

245

246 Chromatographs were recorded on a Waters ACQUITY H-Class UPLC with an ESCi Multi-  
247 Mode ionisation Waters SQ Detector 2 spectrometer (LC system: solvent A: 2 mM ammonium  
248 acetate in water/MeCN (95:5); solvent B: 100% MeCN; column: AQUITY UPLC CSH C18,  
249 2.1 $\times$ 50 mm, 1.7  $\mu$ m, 130  $\text{\AA}$ ; gradient: 63 5-95% B over 3 min with constant 0.1% formic acid).

250

#### 251 High resolution mass spectrometry (HRMS)

252

253 HRMS was carried out on a Waters LCT Premier Time of Flight mass spectrometer. ESI refers  
254 to the electrospray ionisation technique.

255

#### 256 Nuclear magnetic resonance (NMR) spectroscopy

257

258 All pulse sequences are the default (with the exception of the DEPT135) from the Topspin  
259 3.2pl7 software used to control the acquisition. The analysis required <sup>1</sup>H, <sup>13</sup>C, DEPT135, DFQ-  
260 COSY, Heteronuclear Single Quantum Coherence (HSQC, with DEPT 135 editing) and



261 Heteronuclear Multiple Bond Correlation Spectroscopy (HMBC) spectra. All necessary  
262 shaped and decoupling pulses were calculated by the software, using defined 90 degree  
263 pulses.

264 <sup>1</sup>H NMR: Proton magnetic resonance spectra were recorded using an internal deuterium lock  
265 (at 298 K unless stated otherwise) on Bruker DPX (400 MHz; <sup>1</sup>H-<sup>13</sup>C DUL probe), Bruker  
266 Avance III HD (400 MHz; Smart probe), Bruker Avance III HD (500 MHz; Smart probe) and  
267 Bruker Avance III HD 62 (500 MHz; DCH Cryoprobe) spectrometers. Pulse sequence used  
268 zg30 – PLW1=14W, P1=10.5μs, SW=20 ppm, TD=64 K, AQ=3.28 s, D1=1 s, NS=16. Proton  
269 assignments are supported by <sup>1</sup>H-<sup>1</sup>H COSY, <sup>1</sup>H-<sup>13</sup>C HSQC or <sup>1</sup>H-<sup>13</sup>C HMBC spectra, or by  
270 analogy. Chemical shifts (δH) are quoted in ppm to the nearest 0.01 ppm and are referenced  
271 to the residual non-deuterated solvent peak. Discernible coupling constants for mutually  
272 coupled protons are reported as measured values in Hertz, rounded to the nearest 0.1 Hz.  
273 Data are reported as: chemical shift, multiplicity (br, broad; s, singlet; d, doublet; t, triplet; q,  
274 quartet; m, multiplet; or a combination thereof), number of nuclei, coupling constants and  
275 assignment.

276 <sup>13</sup>C NMR: Carbon magnetic resonance spectra were recorded using an internal deuterium  
277 lock (at 298 K unless stated otherwise) on Bruker DPX (101 MHz), Bruker Avance III HD (101  
278 MHz) and Bruker Avance III HD (126 MHz) spectrometers with broadband proton decoupling.  
279 1024 scans (NS) were acquired using pulse sequence 'zggp30', with waltz16 1H decoupling.  
280 90 degree 13C pulse set to 21W (PLW1) for 9.5 μs (P1). 209786 points (TD) were digitised  
281 over 3.02 s (AQ), relaxation delay set to 2 s (D1). Sweep width was 276 ppm (SW), with an  
282 irradiation frequency of 110 PPM (O1P). Carbon spectra assignments are supported by DEPT  
283 editing, <sup>1</sup>H-<sup>13</sup>C HSQC or <sup>1</sup>H-<sup>13</sup>C HMBC spectra, or by analogy. Chemical shifts (δC) are quoted  
284 in ppm to the nearest 0.1 ppm and are referenced to the deuterated solvent peak. Data are  
285 reported as: chemical shift, number of nuclei, multiplicity, coupling constants and assignment.  
286 Magnetic resonance spectra were processed using TopSpin (Bruker). An aryl, quaternary, or  
287 two or more possible assignments were given when signals could not be distinguished by any  
288 means. Standard flavone numbering was followed.

289 DEPT 135: Pulse sequence dept135sp – This is a minor modification of the DEPT sequence  
290 to optimise the spectral baseline and uses an adiabatic shape for 180 degree carbon pulses.  
291 Carbon pulse powers as <sup>13</sup>C experiment above, SW=236.7 ppm, TD=65536, AQ=1.10 s,  
292 D1=2 s, O1=100 ppm, NS=64. Waltz16 decoupling.

293 DFQCOSY: This is a double-quantum filtered experiment; using gradient selection; pulse  
294 sequence cosygpmf. Non-uniform sampling; using a Poisson-gap weighted schedule was  
295 used to acquire 37.5% of 512 increments, each with 2 scans (SWF2=13.37 ppm, TD=4k,  
296 AQ=0.31 s, D1=2 s). Proton pulse powers as above. Processed to 2k x2k points using a sine  
297 function (SSB=2.5)

298 HMBC: This experiment is phase sensitive; uses Echo/Antiecho gradient selection, with a  
299 three-fold low-pass J-filter to suppress one-bond correlations; pulse program 'hmbcetgpl3nd'.  
300 Acquired in phase sensitive mode using Echo/Antiecho-TPPI gradient selection, with a 3 step  
301 low pass j-filter to suppress 1 bond correlations. Long-range J-JCH parameters set to 10 Hz.  
302 Non-uniform sampling; with a Poisson-gap weighted schedule was used to acquire 37.5% of  
303 768 increments; each with 2 scans (SWF1=250, SWF2=12.02 ppm, TD=4096, AQ=0.34 s,  
304 D1=2 s). Processed to 2048x2048 using a sine function (SSB=4 & 2 for F2 and F1), then  
305 converted to magnitude mode in F2. (Topspin command 'xf2m')

306 HSQC: The HSQC was acquired using a Bruker Avance III HD 500Mhz equipped with a dual  
307 <sup>13</sup>C/<sup>1</sup>H cryoprobe; using Topspin 3.2p17. It was acquired in 'non-uniform sampling' mode and  
308 samples 25% of 1024 increments, using a 'poisson-gap' schedule. The data was processed  
309 using the default compressed sensing (CS) method in Topspin 3.5p17 (on your computer) to  
310 2048x2048 data points. This experiment is configured to give -CH<sub>2</sub> groups an opposite phase  
311 to the -CH and -CH<sub>3</sub> groups, using the hsqcedetgmsp.3 pulse sequence. Acquired in phase  
312 sensitive mode using Echo/Antiecho-TPPI gradient selection, multiplicity edited during  
313 selection step with shaped adiabatic pulses. Non-uniform sampling; with a Poisson-gap  
314 weighted schedule was used to acquire 25% of 1024 increments; each with 2 scans  
315 (SWF1=190 ppm, SWF2=12.99 ppm, TD=1816, AQ=0.14 s, D1=0.8 s). Carbon and proton  
316 pulse powers as above. Processed to 2048x2028 points using a qsine function (SSB=2).

317 Standard flavone numbering:

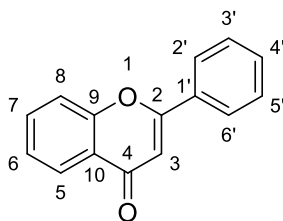

318  
319  
320

321  
322  
323

## 324 Results

325

326 Wooly farina fibres of *Dionysia tapetodes* have distinct surface grooves and differ in  
327 composition to powdery farina.

328

329 *D. tapetodes* grows as a densely packed cushion (Fig. 1A) with large quantities of “wooly”  
330 fibres observed on both the adaxial and abaxial surface of the *D. tapetodes* leaf (Fig. 1B).

331 Woolly farina production likely occurs throughout leaf growth since it is present in both young  
332 leaves (found at the centre of the rosette) and older leaves (positioned on the outside of the  
333 rosette). Farina production at early stages of growth are consistent with the observed  
334 entanglement of fibres between neighbouring leaves as revealed by scanning electron  
335 microscopy (SEM) (Fig. 1C). Individual wooly fibres range in width from 0.9 to 2.1 microns,  
336 with a mean width of 1.6 microns (n=51). High magnification low kV SEM of uncoated fibres  
337 shows fine grooves on their surface, making a series of ridges arranged longitudinally (Fig.  
338 1D). In order to understand how these fibres are formed and maintained, we compared the  
339 Raman spectra of wooly farina of *D. tapetodes* with the powdery farina found near the leaf  
340 margin of *Primula marginata*. Figure 1E shows an overlay of the spectra from both farina  
341 types. The powder spectrum of *P. marginata* matches that of pure flavone (see materials  
342 and methods for details of spectra correlation), indicating that flavone makes up all or the  
343 vast majority of the farina in this species. The spectrum of *D. tapetodes* wooly farina,  
344 however, only shares some of the peaks with the flavone powder of *P. marginata*; at 674,  
345 1001, 1012 and 1568  $\text{cm}^{-1}$ . This suggests a substituted and/or mixture of flavones comprise  
346 the wooly farina of *D. tapetodes*. Spectral search and correlation software were used to  
347 identify candidate functional groups (see materials and methods) based on the acquired  
348 Raman spectra and compared to a reference database that included some flavone  
349 derivatives. While *P. marginata* farina correlated very highly with unsubstituted flavone (hit  
350 quality index 97 out of a possible 100 maximum), *D. tapetodes* wooly farina gave no close  
351 matches. However, the best hits (hit quality index 70-80) were to various combinations of  
352 mono- and di- hydroxy- and methoxy- substituted flavones. This suggests that hydroxy-  
353 and/or methoxy functional groups might co-exist with flavone in the wool fibres.

354

355 The wooly farina of *D. tapetodes* comprises mostly flavone mixed with substituted flavones.

356

357 A sample of the wooly farina from *D. tapetodes* was further analysed by high-performance  
358 liquid chromatography (HPLC), liquid chromatography-mass spectrometry (LCMS), high-  
359 performance mass spectrometry (HRMS) and nuclear magnetic resonance (NMR)  
360 spectroscopy. All data are presented together with a detailed interpretation in Supplementary  
361 dataset S1 that additionally comprises Supplementary data Figs. S1-S7 and Table S1. This  
362 analysis revealed that the wooly farina sample was mainly composed of unsubstituted flavone  
363 (>90% by analytical HPLC, structure A in Fig. 2). Identical analytical data was obtained for a  
364 pure sample of flavone from a commercial source (Supplementary data dataset S1, Fig. S4).  
365 The HPLC, LCMS and HRMS data indicated that there are other, substituted flavone species  
366 present in the wooly farina sample; exactly how many other species is not clear. HPLC  
367 analysis gave only one, whereas LCMS data suggested the presence of multiple other

368 flavonoids. Mass ions were observed in the LCMS corresponding to hydroxy- and methoxy-  
369 substituted flavones (Supplementary data Figs. S1 and S2). To provide more information on  
370 the structure of the minor flavone species, 2D NMR was carried out and yielded candidate  
371 structures corresponding to 2'-hydroxyflavone and 4'-hydroxyflavone (Fig. 2, Supplementary  
372 data Fig. S7).

373

374 The wool fibres emerge from distinct holes in the cell wall of the glandular trichome head cell  
375 and are in close proximity to dense material of the vacuole.

376

377 Focal points representing the origin of numerous fibres can be seen on the *D. tapetodes* leaf  
378 surface (Fig. 3A) corresponding to mature flattened glandular trichomes (Fig. 3B).

379 Interspersed between these locations are numerous smaller and extended trichomes that  
380 have fewer, single or no wool fibres emerging from the head cells and likely represent  
381 glandular trichomes at different levels of maturity (Fig. 3B and 3C). It is evident that, when  
382 looking at the smaller trichomes, farina emerges from a few discrete locations on the  
383 glandular head cell that may grow in number as the cell ages. This appears to be in contrast  
384 to *P. marginata*, where smaller crystals completely cover the circumference of the head cell  
385 (Fig. 3D). These data show that, for *D. tapetodes*, flavone incorporation and extrusion needs  
386 to be sustained at the same site on the (head) cell surface. We used cryoSEM to observe,  
387 close-up, the junction between wool fibre and cell (Fig. 4A, B) where the fibre appears to  
388 come out of the cell wall. We generated random cryofractures through the leaf that might  
389 include a glandular head cell, however, the interaction of the fracture knives with the wool  
390 resulted in dislodging of the trichome from the leaf, as well as more cellular debris at the  
391 fracture site. We found a 5 s wash with 70% v/v ethanol removed the surface wool and  
392 resulted in better cryofractures with less debris. Sites of wool fibre extrusion, represented as  
393 small "craters" on the cell surface, are visible after the washing (Fig. 4C). Cryofractures that  
394 included any part of the gland head cell were, however, very rare. One fracture removed  
395 most of the head cell leaving a part of the head and some cytoplasm intact (Fig. 4D).

396 Ethanol washing had removed the external wool fibres from the sample, however, a single  
397 fibre is observed inside the cell that was protected from the solvent (red arrow in Fig. 4D).

398 This suggests the wool is made inside the cell and then somehow threaded through a gap in  
399 the wall. A second fracture was obtained through the centre of the gland hair cell (Fig. 4E)  
400 and a wool exit site could be observed close to the fracture plane. At this location the  
401 vacuole appeared to be close to the surface with a small amount of cytoplasm in between  
402 (Fig. 4F). Given that we could not obtain a fracture through the site of wool extrusion in the  
403 cell wall, we carried out Transmission Electron Microscopy (TEM) on post-stained sections  
404 of fixed glandular trichomes. TEM processing completely removes all the farina wool,

405 however, complete gaps in the cell wall were observed (Fig. 4G) and were in close proximity  
406 to dense particulates that, based on the FE-SEM imaging described below, represent  
407 contents of the vacuole. These gaps are not an artefact from masking or non-uniform  
408 staining for TEM because they were also observed, in addition to the dense vacuoles, with  
409 light microscopy (Supplementary data Fig. S8). A small amount of cytoplasm, as well as an  
410 amorphous stained region, can be observed between the dense particulates and the cell  
411 wall gap (Fig. 4H). A magnified TEM view of the wall shows a mesh structure with layers of  
412 differing density that likely represent polysaccharide components including cellulose (Fig.  
413 4I). A low density outer layer is present that is consistent with cuticular wax plus a thin  
414 epicuticular layer on top (Fig. 4I). This was confirmed by correlative fluorescence lifetime  
415 imaging and Raman microscopy which showed six Raman peaks (1062, 1132, 1294, 1416,  
416 1438, 1465  $\text{cm}^{-1}$ ) that correspond to the major peaks of epicuticular waxes from Sorghum  
417 (Farber *et al.* 2019). These wax peaks were specific to the outer surface of the gland hair  
418 cell and were found together with the flavone-type signals (Supplementary data Fig. S9). An  
419 intracellular store of flavone was also located.

420 In order to identify how the generation of a hole in the cell wall is coupled with directed  
421 deposition of flavone to make a thread, we used a higher throughput approach for imaging  
422 larger numbers of glandular trichomes. Full rosettes that include leaves at various stages of  
423 development were stained, embedded and sectioned. These large area sections were  
424 viewed by field emission scanning electron microscopy (FE-SEM) of backscattered electrons  
425 and gave good contrast for observations of membranes. Out of 11 gaps examined, where  
426 vacuoles could be easily distinguished from other organelles due to their intense staining, 6  
427 gaps were within 1  $\mu\text{m}$  of its closest vacuolar compartment with distances in the range 0 –  
428 2.6  $\mu\text{m}$  (mean 1.1  $\mu\text{m}$ , median 0.72  $\mu\text{m}$ ). FE-SEM showed the gaps in the cell wall and  
429 cuticle also includes the plasma membrane (Fig. 4J-L,); 15/15 gaps observed with FE-SEM  
430 had no plasma membrane crossing the gap. For two glandular heads, we observed the gap  
431 to extend further inside the cell as far as the vacuole and in one section the tonoplast was  
432 intact (Fig. 4M, N). We observed fully formed trichomes where the dense staining was seen  
433 in a void within the cell wall of width 1.15  $\mu\text{m}$  consistent with the size expected of a forming  
434 wool thread (Fig. 4O) and suggesting a careful coupling between wall digestion and  
435 deposition of the flavone and derivatives.

436

## 437 **Discussion.**

438

439 *D. tapetodes* is covered with wooly farina around the leaves. It is not entirely understood  
440 what the purpose of the farina is, however, tolerance to freezing and high UV have been  
441 cited (Caldwell 1971; Sisa *et al.* 2010). Consistent with the latter, there exists an efarinose

442 *D. tapetodes* accession at the Cambridge University Botanic Garden and horticulturists  
443 working closely with the plants report that it scorches more easily in the sun compared to the  
444 farinose accessions.

445 The wooly farina threads radiate in all directions from mature glandular head cells of  
446 trichomes that are interspersed on the leaf epidermis. In addition to biosynthesis, these head  
447 cells appear to act as anchor points of the wool which can extend between adjacent leaves.  
448 The study of wool farina formation in *D. tapetodes* is made challenging by the physical and  
449 chemical characteristics of the wool itself. CryoSEM gave good preservation of wool and  
450 cellular structure but despite numerous random cryo-fractures, an image of a thread exiting  
451 the cell through the cell wall gap was never obtained. High resolution light and electron  
452 microscopy of embedded and sectioned material gave the best images of the wool exit sites  
453 and surrounding subcellular compartments, however, the processing removed the wool  
454 threads (although dense vacuolar staining likely attributed to stores of flavones and  
455 derivatives can be seen). Observing the gaps within the cuticle, cell wall, plasma membrane  
456 and cytoplasm where the thread is presumed to exist, before processing, does give us clues  
457 as to how the wool is made; we speculate that a small void in the wall, arising by digestion of  
458 the wall constituents, begins on the side of the wall facing the cell (Fig. 5). Flavone material  
459 from the vacuole is transported to and deposited into this void. Completion of digestion to  
460 include the cuticle permits the flavone aggregate to then extrude outside the cell to form the  
461 wool while forming a perfect seal with the edge of the hole (Fig. 5), helped by the large  
462 amounts of epicuticular wax. For thread elongation, flavone is continually deposited to the  
463 cytoplasmic (elongating) end and the thread can protrude deeper into the cell towards the  
464 vacuole(s). This apparent vacuole fusion may arise due to rapid flavone transport and  
465 deposition across the tonoplast.

466 A question remains as to how the wooly threads of farina are formed and stably maintained  
467 where other flavone-based farina forms a powder. Our compositional analyses suggest the  
468 *D. tapetodes* wool is predominantly flavone mixed with 2'- and 4'-hydroxyflavones plus small  
469 quantities of other unidentified substituted flavones. The three identified flavones are not  
470 unique to this species, since they are found among the powdery *Primula*, where they are  
471 referred to as epicuticular flavonoids (Colombo *et al.* 2014). There are, however, data  
472 supporting strong intermolecular H-bonding for the 2' and 4'-hydroxy positions compared to  
473 weak H-bonds for the 6-hydroxy position and *intramolecular* bonds in 5-hydroxyflavone  
474 (Looker and Hanneman 1962; Looker *et al.* 1966). These intermolecular interactions  
475 between the 2' and 4'-hydroxyflavones and with the bulk flavone may be enough to maintain  
476 the integrity of a wool thread. Our Raman data of the *P. marginata* powder show a match  
477 with only flavone with no evidence of a mixture like that observed for *D. tapetodes* and so in  
478 the former species promoting powder rather than wool extrusion seen in the latter. Despite

479 this observation, chemical analysis of exudate flavonoids demonstrate large quantities of  
480 flavone and 2'-hydroxyflavone in *P. marginata* (Valant-Vetschera *et al.* 2009). We put  
481 forward a hypothesis that, while a diversity of substituted flavones is maintained across  
482 powdery and wooly farina forming species, only wooly farina species can correctly mix and  
483 incorporate these at a single site of synthesis to make continuous threads. The selection  
484 pressure(s) that have resulted in powdery vs wooly vs efarinose species is not understood,  
485 however, the wool does appear to give better coverage over the whole plant while we  
486 speculate that the fine loose powder, while more local and easier to dislodge, can yield a  
487 denser coating. In addition to the reported capacity of flavonoids to provide protection  
488 against UV and potentially during freezing events, the unique capacity of *D. tapetodes* for  
489 threading flavones may provide another evolutionary step towards previously described  
490 xeromorphic adaptation to drought in the genus *Dionysia* (Wendelbo 1971). Indeed, such  
491 specific spatial deposition of flavones seems to offer more leaf coverage from a single  
492 production point (glandular trichome), which may limit air movement on the leaf surface,  
493 therefore limiting water loss. It remains to be seen whether the properties of wooly farina  
494 might make it a useful industrial biomaterial.

495

#### 496 **Acknowledgements.**

497

498 We thank Trevor Groves with help with low kV SEM imaging of uncoated fibres and Prof.  
499 Beverley Glover for critical reading of the manuscript. We are grateful for the opportunity to  
500 access the *Dionysia tapetodes* and *Primula marginata* accessions at Cambridge University  
501 Botanic Garden. TEM and FE-SEM were performed using the EM facilities of the Cambridge  
502 Advanced Imaging Centre (CAIC), University of Cambridge. The Spring lab acknowledges  
503 support from EPSRC, BBSRC and the Royal Society. JG thanks the BBSRC Doctoral  
504 Training Programme and AstraZeneca for funding. The Microscopy Core facility at the  
505 Sainsbury Laboratory is supported by the Gatsby Charitable Foundation.

506

#### 507 **References.**

508

- 509 **Beckett KA, Grey-Wilson C, Alpine Garden Society (Great Britain). 1993.** *Encyclopaedia*  
510 *of alpines*. AGS Publications.
- 511 **Bhutia TD, Valant-Vetschera KM. 2012.** Diversification of Exudate Flavonoid Profiles in  
512 Further *Primula* spp. *Natural Product Communications* **7**: 587–589.
- 513 **Bhutia TD, Valant-Vetschera KM, Brecker L. 2013.** Orphan Flavonoids and  
514 Dihydrochalcones from *Primula* Exudates. *Natural Product Communications* **8**: 1081–1084.
- 515 **Blasdale WC. 1945.** The Composition of the Solid Secretion Produced by *Primula*

- 516 Denticulata. *Journal of the American Chemical Society* **67**: 491–493.
- 517 **van Brederode J, Steyns J. 1985.** UV-microscopic studies on the vacuolar changes caused  
518 by the flavone “aglycone” isovitexin in *Silene pratensis* plants. *Protoplasma* **128**: 59–63.
- 519 **Bunge A. 1871.** Die Arten der Gattung *Dionysia* Fenzl. *Bull. Acad. Imp. Sci. St. Petersburg*  
520 **16**: 547–563.
- 521 **Caldwell MM. 1971.** Solar UV irradiation and the growth and development of higher plants.  
522 *Photophysiol Curr Top.*
- 523 **Colombo PS, Flamini G, Christodoulou MS, et al. 2014.** Farinose alpine *Primula* species:  
524 Phytochemical and morphological investigations. *Phytochemistry* **98**: 151–159.
- 525 **Farber C, Li J, Hager E, et al. 2019.** Complementarity of Raman and Infrared Spectroscopy  
526 for Structural Characterization of Plant Epicuticular Waxes. *ACS Omega* **4**: 3700–3707.
- 527 **Fico G, Rodondi G, Flamini G, Passarella D, Tomé F. 2007.** Comparative phytochemical  
528 and morphological analyses of three Italian *Primula* species. *Phytochemistry* **68**: 1683–1691.
- 529 **Grey-Wilson C. 1989.** *The genus Dionysia*. Alpine Garden Society.
- 530 **Gunning BES, Steer MW. 1996.** *Plant cell biology: structure and function*. Jones and  
531 Bartlett Publishers.
- 532 **Hinterdobler W, Valant-Vetschera KM, Brecker L. 2017.** New *Primula* -type Flavones from  
533 Exudates of Selected *Dionysia* spp. (Primulaceae). *Natural Product Communications* **12**:  
534 1673–1676.
- 535 **Jiang N, Doseff AI, Grotewold E. 2016.** Flavones: From Biosynthesis to Health Benefits.  
536 *Plants (Basel, Switzerland)* **5**.
- 537 **Lidén M. 2007.** The genus *Dionysia* (Primulaceae), a synopsis and five new species.  
538 *Willdenowia* **37**: 37.
- 539 **Looker JH, Hanneman WW. 1962.** Physical and Chemical Properties of Hydroxyflavones. I.  
540 Infrared Absorption Spectra of Monohydroxyflavones and Their O-Methyl and O-Acetyl  
541 Derivatives 1,2. *The Journal of Organic Chemistry* **27**: 381–389.
- 542 **Looker JH, Hanneman WW, Kagal SA, Dappen JI, Edman JR. 1966.** Physical and  
543 chemical properties of hydroxyflavones. IV. Infrared absorption spectra of dihydroxyflavones  
544 containing the 5-hydroxyl group. *Journal of Heterocyclic Chemistry* **3**: 55–60.
- 545 **Marinova K, Kleinschmidt K, Weissenböck G, Klein M. 2007.** Flavonoid biosynthesis in  
546 barley primary leaves requires the presence of the vacuole and controls the activity of  
547 vacuolar flavonoid transport. *Plant physiology* **144**: 432–44.
- 548 **Müller H. 1915.** XCVI.—The occurrence of flavone as the farina of the primula. *J. Chem.*  
549 *Soc., Trans.* **107**: 872–878.
- 550 **Schopker H, Kneisel M, Beerhues L, Robenek H, Wiermann R. 1995.** Phenylalanine  
551 ammonia-lyase and chalcone synthase in glands of *Primula kewensis* (W. Wats):  
552 immunofluorescence and immunogold localization. *Planta* **196**: 712–719.



- 553 **Sisa M, Bonnet SL, Ferreira D, Van der Westhuizen JH. 2010.** Photochemistry of  
554 Flavonoids. *Molecules* **15**: 5196–5245.
- 555 **Valant-Vetschera KM, Bhutia TD, Wollenweber E. 2009.** Exudate Flavonoids of Primula  
556 Spp: Structural and Biogenetic Chemodiversity. *Natural Product Communications* **4**: 365–  
557 370.
- 558 **Valant-Vetschera KM, Bhutia TD, Wollenweber E. 2010.** Chemodiversity of exudate  
559 flavonoids in Dionysia (Primulaceae): A comparative study. *Phytochemistry* **71**: 937–947.
- 560 **Vitalini S, Flamini G, Valaguzza A, Rodondi G, Iriti M, Fico G. 2011.** Primula spectabilis  
561 Tratt. aerial parts: Morphology, volatile compounds and flavonoids. *Phytochemistry* **72**:  
562 1371–1378.
- 563 **Wendelbo P. 1971.** On xeromorphic adaptations in the genus Dionysia (Primulaceae). *Ann*  
564 *Naturhist Mus Wien* **75**: 249–254.
- 565 **Wightman R, Busse-Wicher M, Dupree P. 2019.** Correlative FLIM-confocal-Raman  
566 mapping applied to plant lignin composition and autofluorescence. *Micron* **126**: 102733.
- 567 **Wightman R, Wallis S, Aston P. 2018.** Leaf margin organisation and the existence of  
568 vaterite-producing hydathodes in the alpine plant Saxifraga scardica. *Flora* **241**: 27–34.
- 569 **Wollenweber E, Schnepf E. 1970.** Vergleichende Untersuchungen über die flavonoiden  
570 Exkrete von “Mehl”- und “Öl” -Drüsen bei Primeln und die Feinstruktur der Drüsenzellen. *Z.*  
571 *Pflanzenphysiol* **62**: 216–227.
- 572
- 573
- 574
- 575 **Supplementary Data list.**
- 576
- 577 **Dataset S1 comprising Figures S1-S7 and Table S1.** All data and interpretations/  
578 commentary for HLPC, LCMS, HMRS and NMR chemical analyses.
- 579
- 580 **Figure S8.**
- 581
- 582 **Figure S9.**
- 583

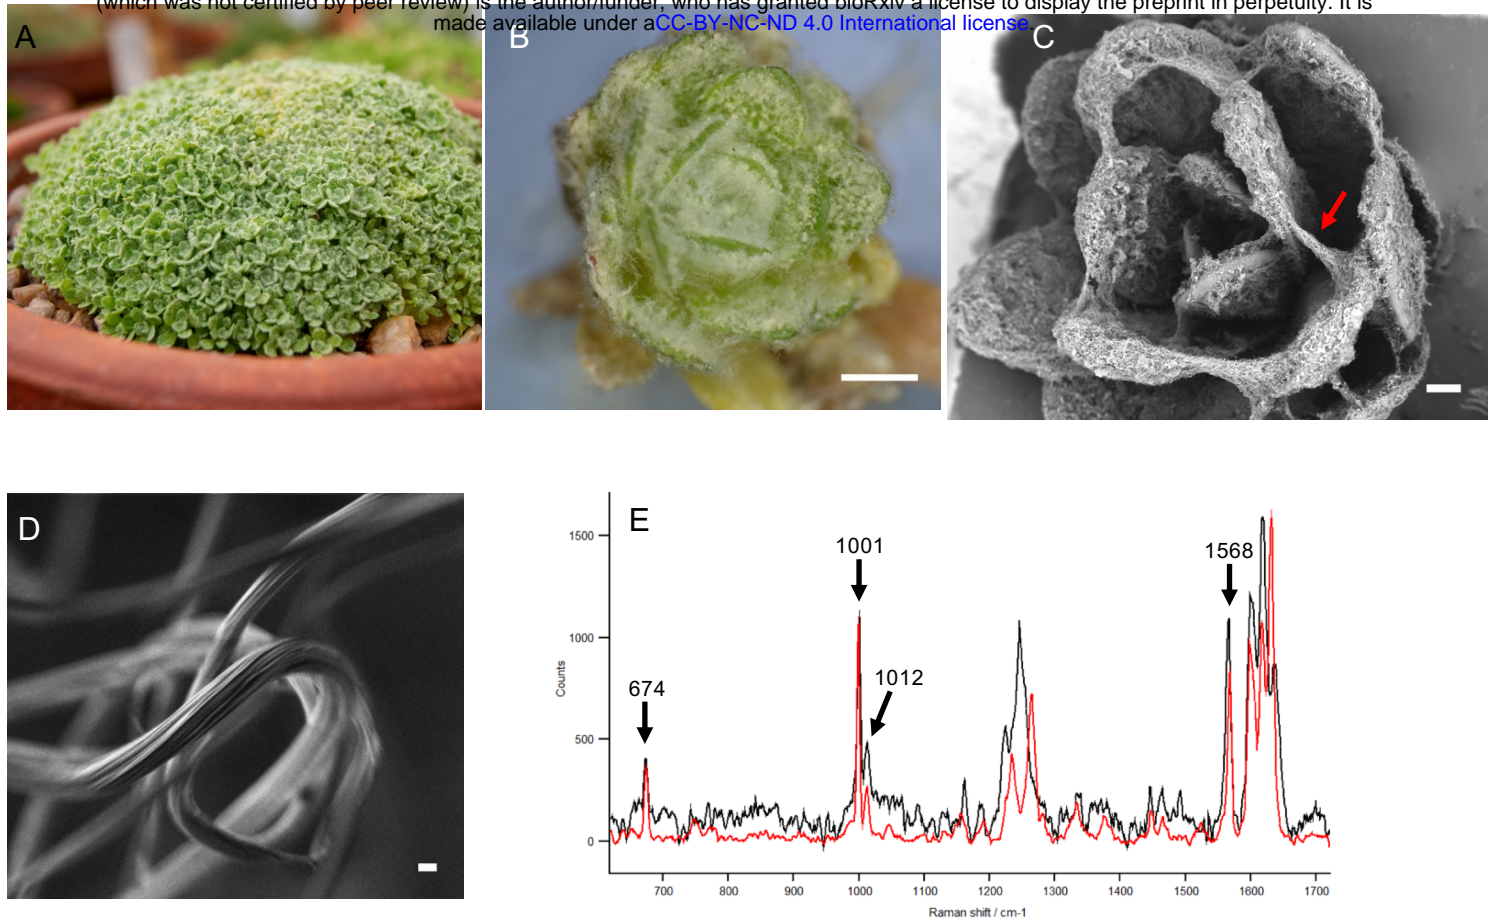

Figure 1. Farina wool observations on leaves of *Dionysia tapetodes*. A) Overview of the densely-packed, cushion-forming *D. tapetodes*. B) Stereomicroscope image of white wooly farina on leaves of *D. tapetodes*. Scale bar = 1 mm. C) Scanning electron microscopy (SEM) of wooly farina distributed on and between leaves (e.g. red arrow) of *D. tapetodes*. Scale bar = 300  $\mu\text{m}$ . D) High magnification SEM image of farina fibre showing fine surface structure. Scale bar = 1  $\mu\text{m}$ . E) Raman microscopy of fingerprint region of farina of *Dionysia tapetodes* (black) compared with that of the powdery farina from *Primula marginata* (red). Principle peak assignments ( $\text{cm}^{-1}$ ) common to both types of farina are indicated.

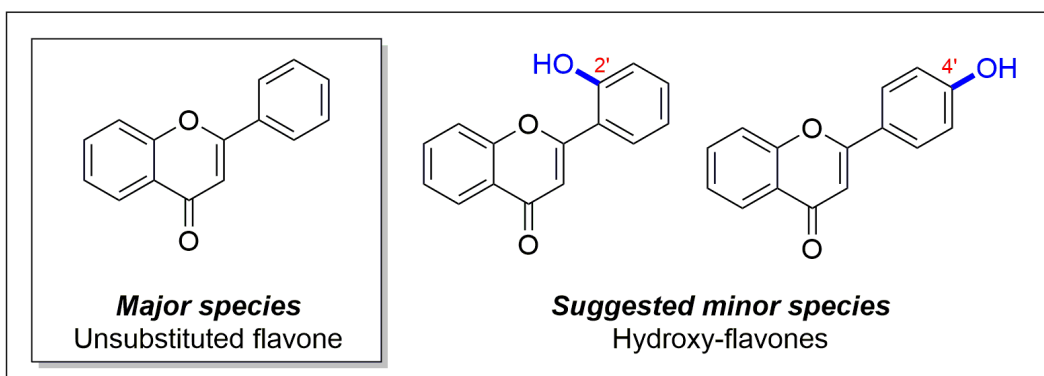

Figure 2. Molecular structures of candidate molecular species that form the wooly farina of *D. tapetodes*. Structures are derived from chemical analyses described in dataset S1.

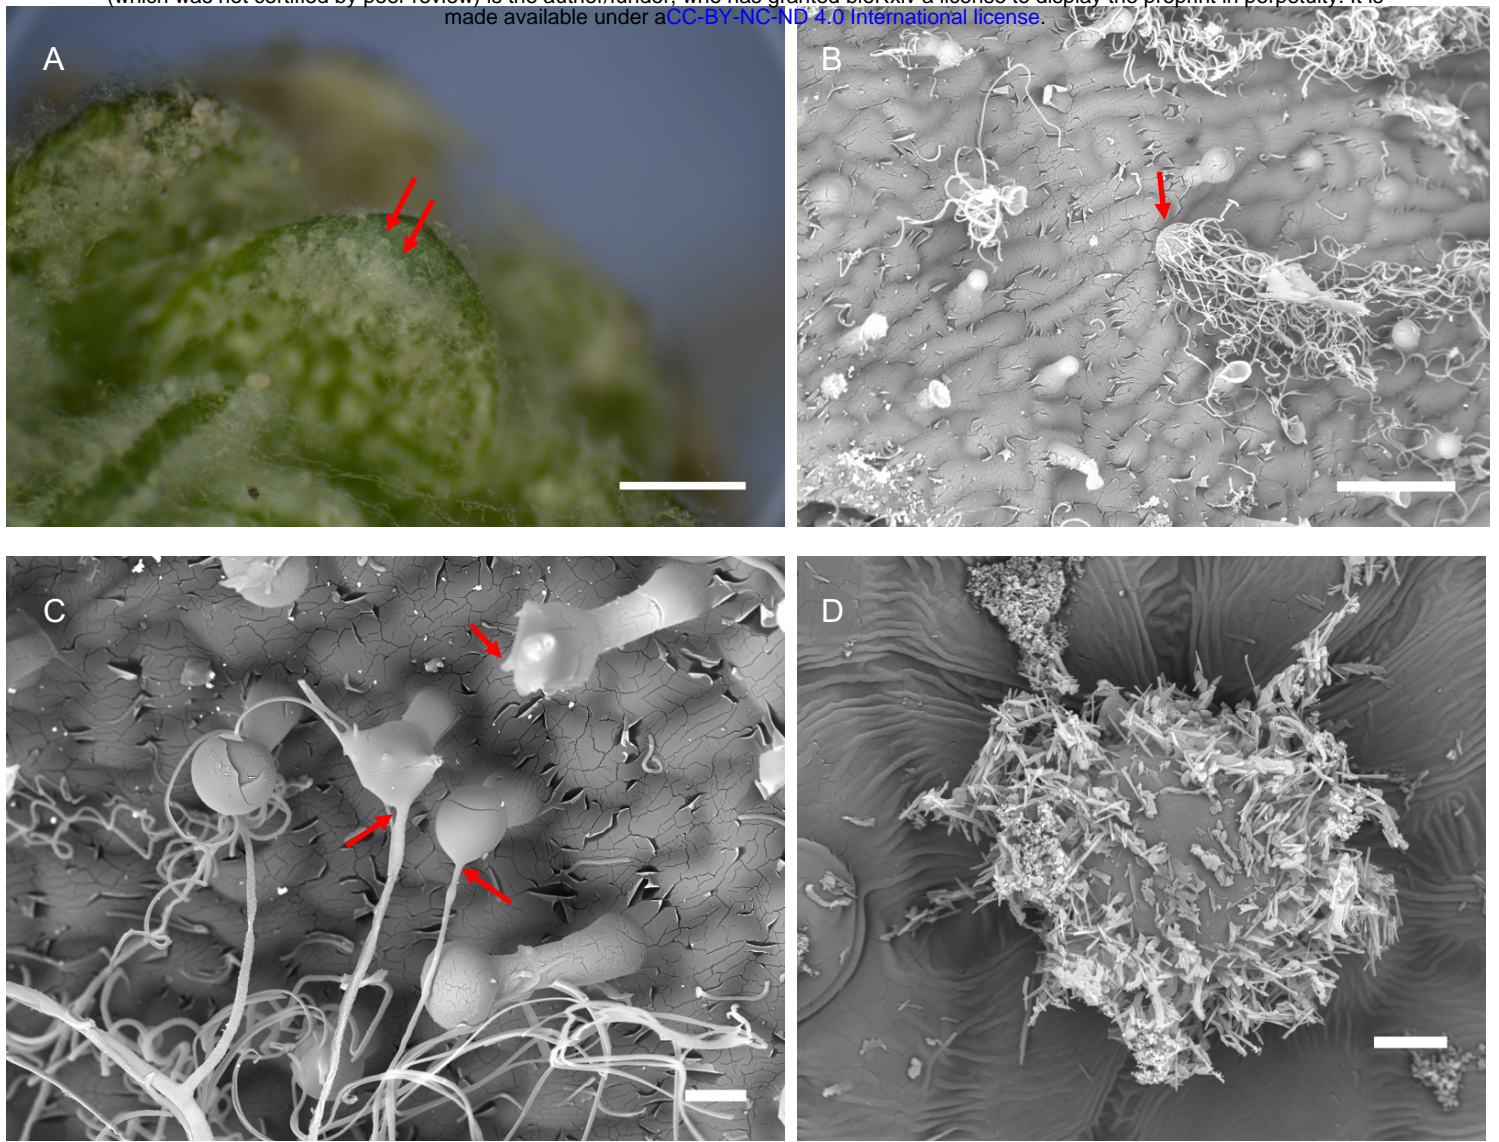

Figure 3. Formation of farina at the single cell level. A) Stereomicroscope image showing examples of wool exit points (red arrows) on the surface of the leaf of *D. tapetodes*. Scale bar = 500  $\mu\text{m}$ . B) SEM image of glandular trichomes, including an example of a mature glandular trichome producing large quantities of wooly farina (red arrow). Scale bar = 50  $\mu\text{m}$ . C) SEM image showing farina wool exit points (red arrows) from glandular trichomes. Scale bar = 10  $\mu\text{m}$ . D) SEM image showing glandular trichome of *P. marginata* covered with powdery flavone farina. Scale bar = 10  $\mu\text{m}$ .

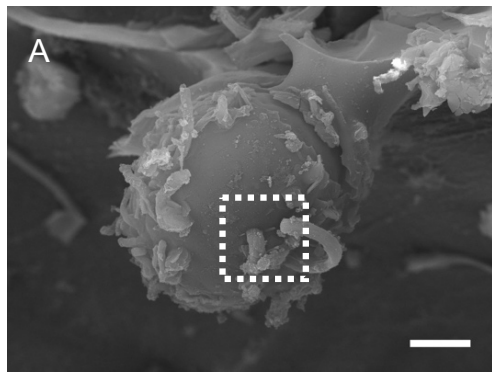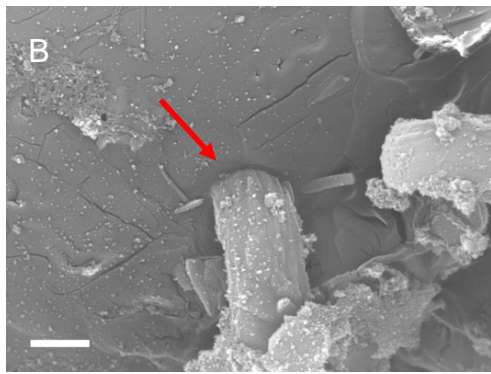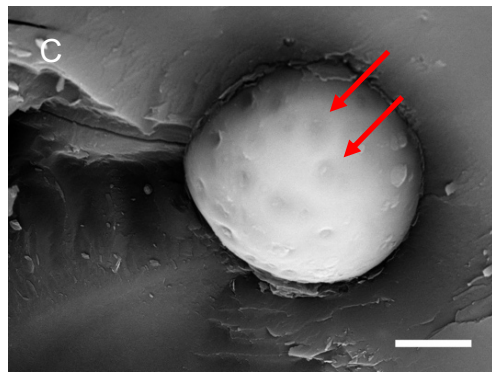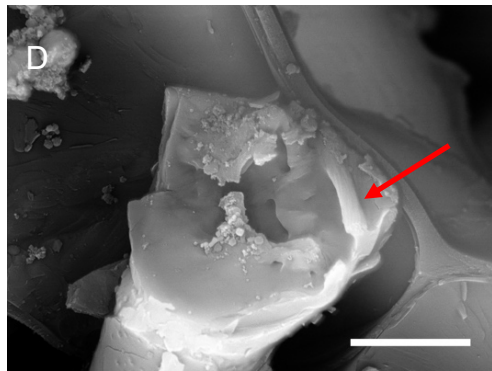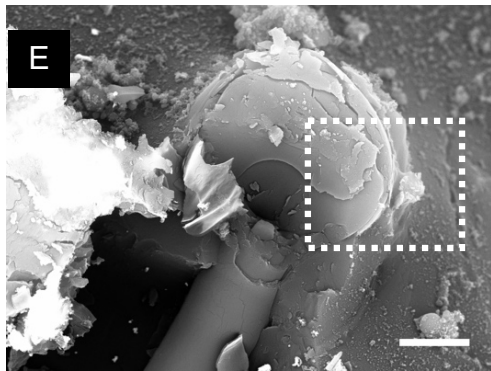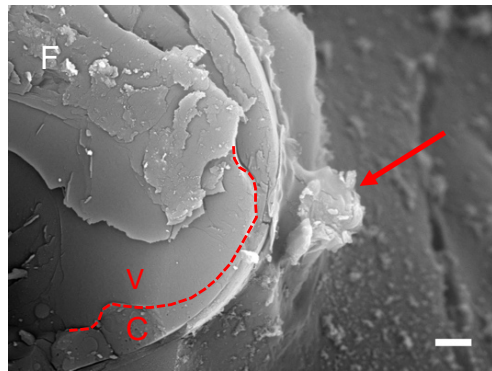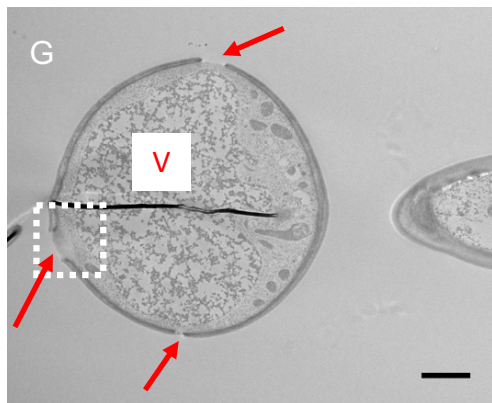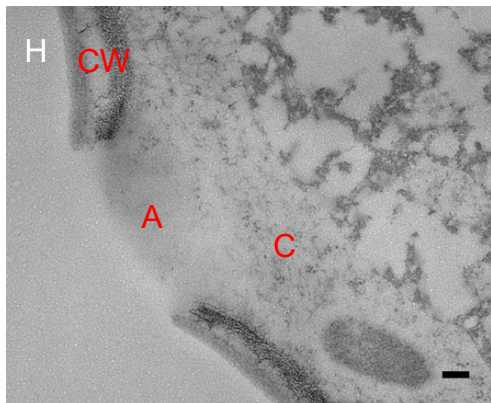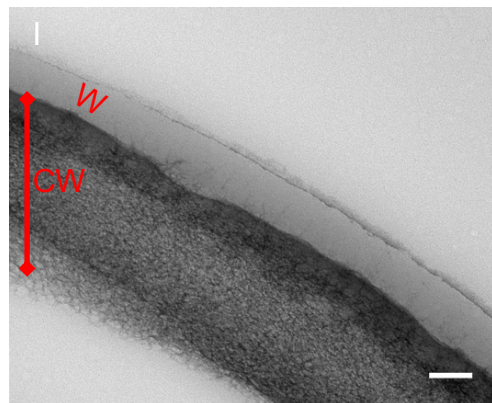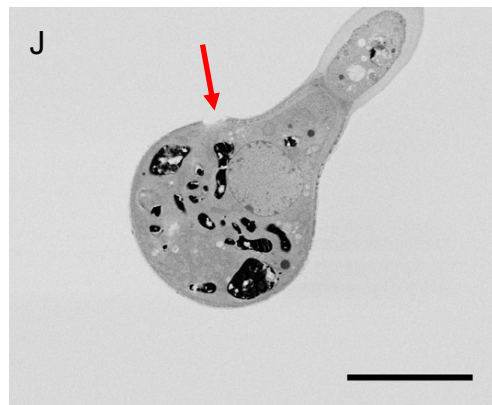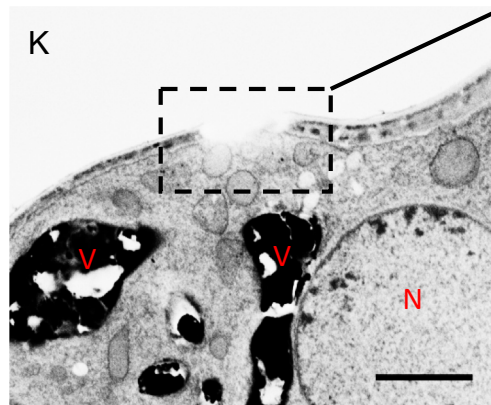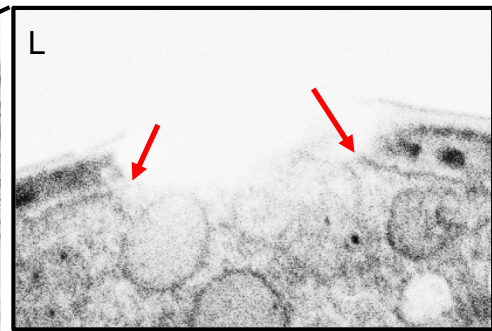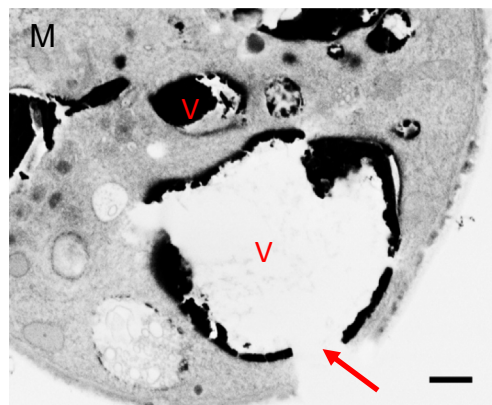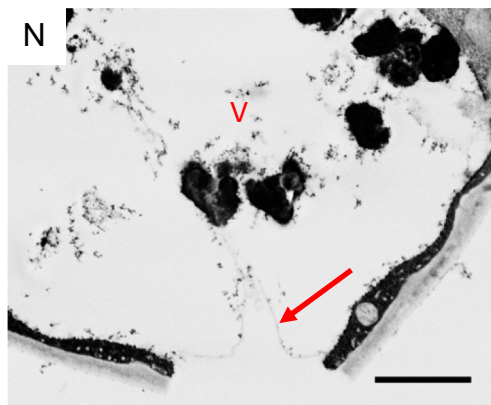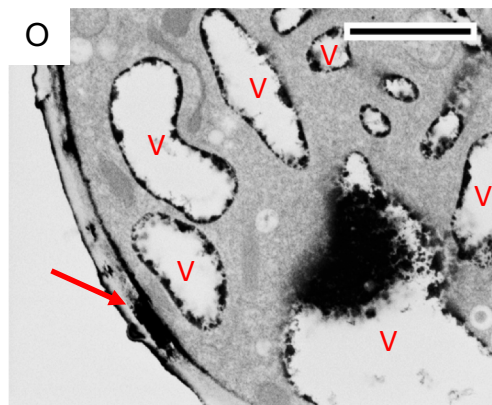

Figure 4. Exit points of farina wool from glandular trichomes. A) SEM image showing wool exiting from the surface of a glandular trichome cell. A magnified view of the boxed region is shown in (B). Cell surface-farina interface is labeled by a red arrow. Bars = 5  $\mu\text{m}$  (A) and 1  $\mu\text{m}$  (B). C) Surface of glandular trichome cell after ethanol wash to remove farinose material. Examples of wool exit points are labeled by red arrows. Bar = 5  $\mu\text{m}$ . D) SEM after cryo-fracture showing inner face of part of the surface of a trichome cell. A piece of farina wool is found to be present intact inside the cell (red arrow). Bar = 5  $\mu\text{m}$ . E) SEM after cryofracture revealing cell contents. Bar = 5  $\mu\text{m}$ . A magnified view of the boxed area is shown in (F) where wool exit is observed (red arrow). The dashed line represents the location of the tonoplast. V= Vacuole, C= cytoplasm. The Vacuole is seen to be in close proximity to the wool exit site. Bar = 1  $\mu\text{m}$ . G) Transmission EM (TEM) image of section through glandular trichome. Wool exit sites are marked by red arrows and are defined as a gap in the cell wall. Electron dense material, consistent with vacuole contents (V), are in close proximity to these sites. Dark line in the centre is an artefact from a fold in the section. Bar = 2  $\mu\text{m}$ . H) a magnified view of a wool exit site (boxed region) showing a gap in the cell wall (CW) and an amorphous region (A) within this gap. Beneath the amorphous region is observed a small amount of cytoplasm (C). Bar = 200 nm. (I) TEM image of a section of intact cell wall (CW) overlaid by a waxy low density layer (W). Bar = 100 nm. J, K, L) FE-SEM of glandular head showing wool exit site (arrow in J) Bar = 10  $\mu\text{m}$ . A magnified view of the area covering the exits site is shown in (K) together with the electron dense vacuoles (V) and the Nucleus (N) Bar = 2  $\mu\text{m}$ . Further magnification (L) shows the plasma membrane does not traverse the gap (arrows). M, N) Exit sites that extend to the vacuole. In (N) the tonoplast is found to be intact (arrow). Bars = 2  $\mu\text{m}$ . O) A build up of electron dense material accumulates within a void in the cell wall (arrow). Vacuoles (V) containing similar electron dense material are found in close proximity. Bar = 2  $\mu\text{m}$ .

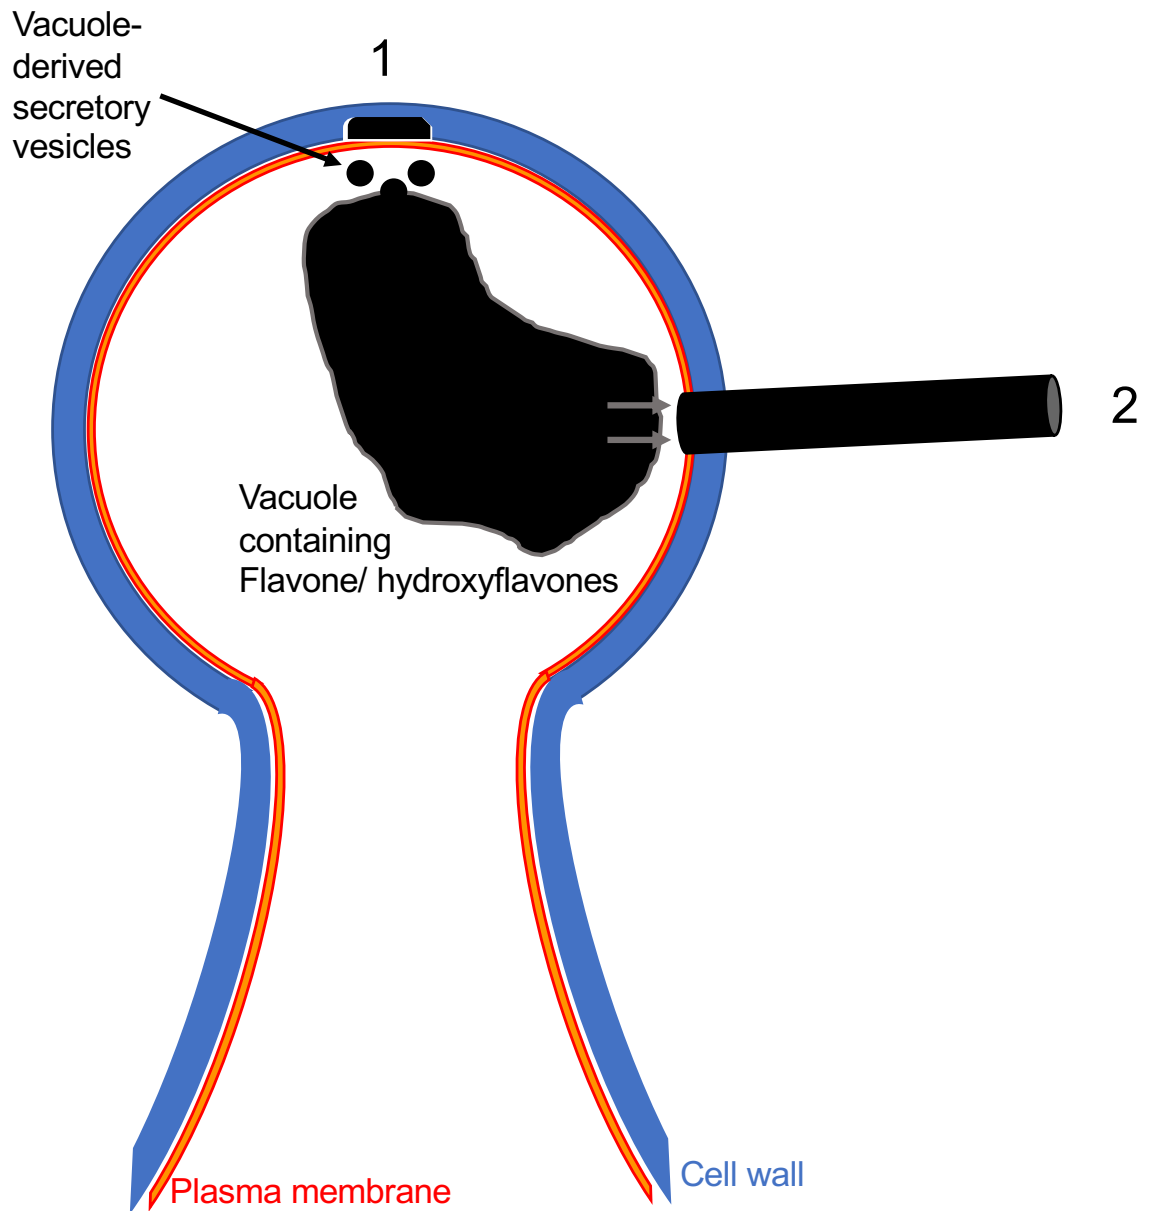

Figure 5 – Proposed schematic of farina wool formation by the glandular trichome. (1) Localised cell wall digestion commences from the membrane face and is coupled with deposition of (hydroxy)flavones within the space. (2) Cell wall digestion produces a hole through which the (hydroxy)flavones are extruded. The (hydroxy)flavones may be deposited directly from the vacuole.

## Dataset S1 including Figures S1 to S7 and Table S1

### Analytical HPLC analysis of wool fibre samples

To assess the purity of the sample, HPLC analysis was performed using two different gradients (5-95% and 40-95% acetonitrile in water) to ensure that all peaks present were observed.

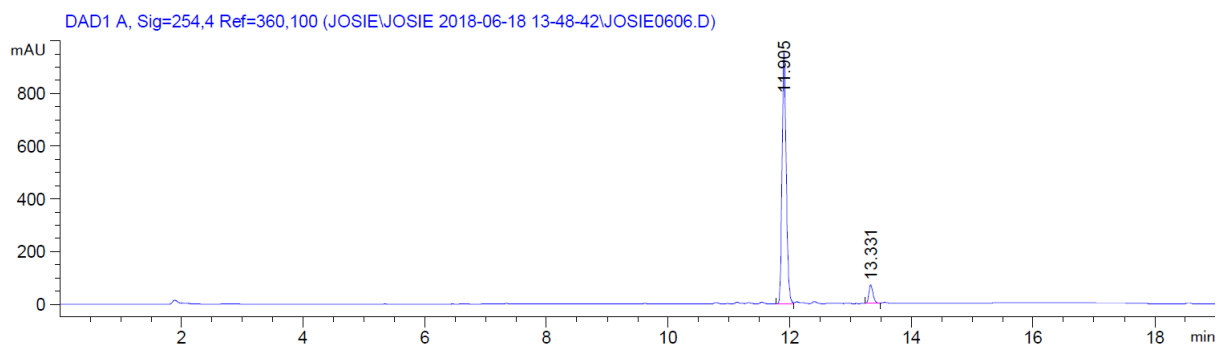

**Figure S1a** The HPLC spectra for analysis of the sample using a 5-95% acetonitrile in water gradient. The large signal at 2-2.5 minutes in the 220 nm trace (Figure 1 and 2) is due to dimethylsulfoxide (DMSO) which was used to dissolve the sample.

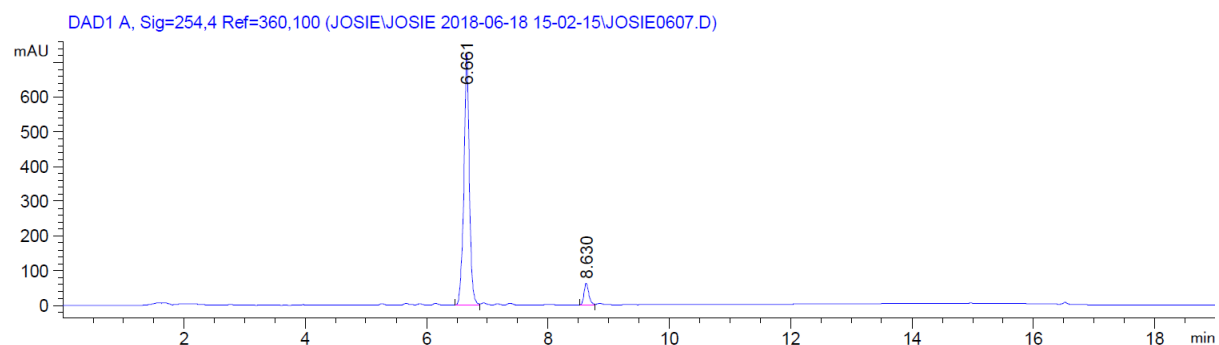

**Figure S1b** The HPLC spectra for analysis of the sample using a 5-95% acetonitrile in water gradient.

**Table S1** The peaks observed in the spectra shown in Figure 1.

| Peak | Retention time (min) | Area (mAU*s) | Area (%) |
|------|----------------------|--------------|----------|
| 1    | 11.905               | 4507.078     | 93.0     |
| 2    | 13.331               | 340.296      | 7.0      |
| 1    | 6.661                | 4535.346     | 93.0     |
| 2    | 8.630                | 339.714      | 7.0      |



## S2: Mass spectrometry of wool fibre sample

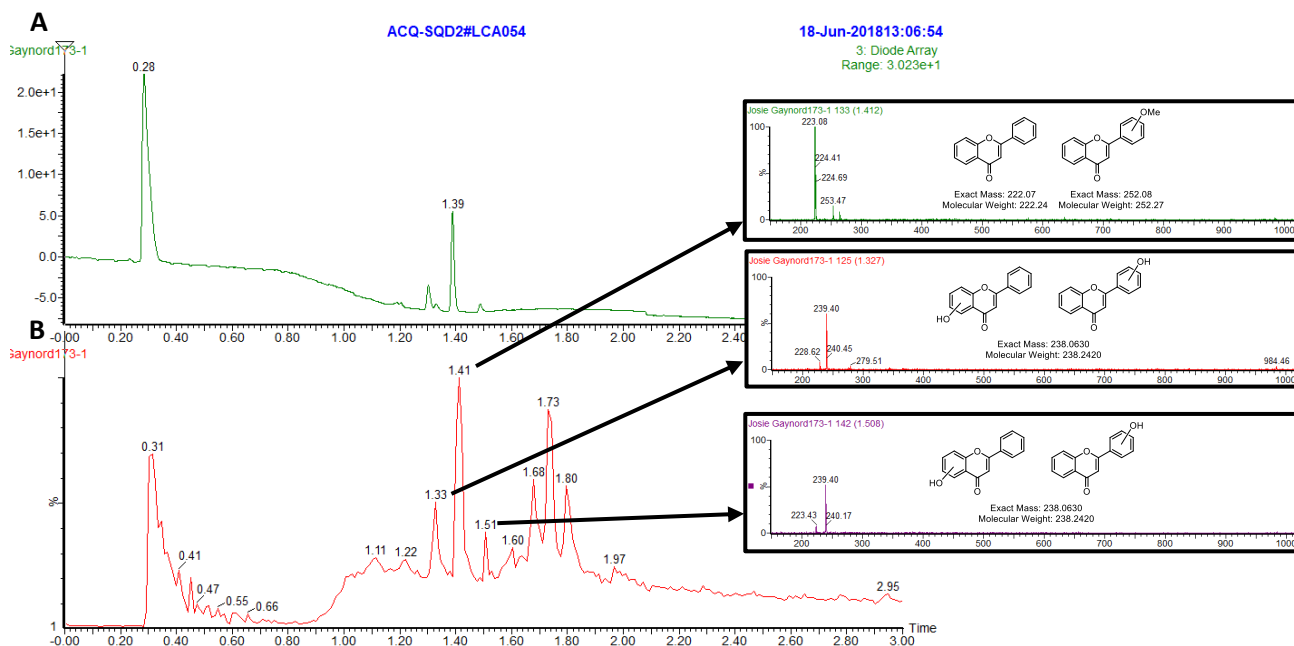

**Figure S2a** A: The UV trace for the LCMS spectrum of the plant sample. B: The corresponding ES+ trace. Insets are mass traces (ES+) for individual peaks, as indicated by the arrows. Suggested chemical structures with exact masses and molecular weights are shown over the relevant mass spectra.

### Monoisotopic Mass, Even Electron Ions

43 formula(e) evaluated with 1 results within limits (all results (up to 1000) for each mass)

Elements Used:

C: 0-83 H: 0-500 O: 0-23

JG-RW-1 CRUDE

Spring\_DR5721-1 27 (0.606) Cm (27:46)

49  
1: TOF MS ES+  
6.83e3

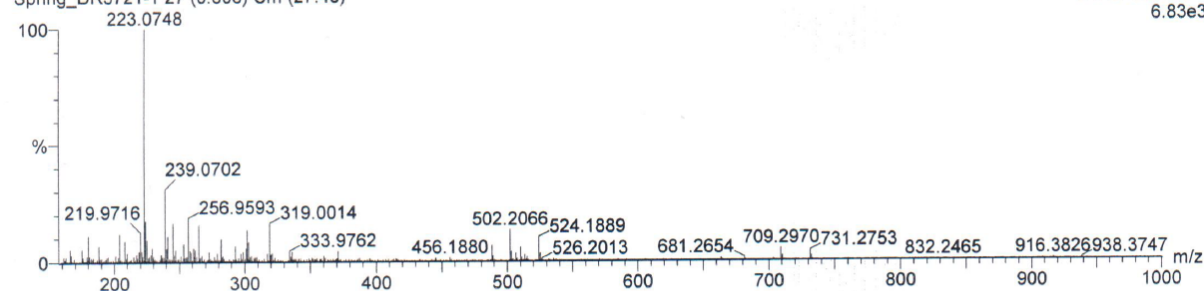

Minimum: -5.0  
Maximum: 200.0 5.0 100.0

| Mass     | Calc. Mass | mDa  | PPM  | DBE  | i-FIT | Formula    |
|----------|------------|------|------|------|-------|------------|
| 223.0748 | 223.0759   | -1.1 | -4.9 | 10.5 | 8.3   | C15 H11 O2 |

**Figure S3** The high-resolution mass spectrum (HRMS) for the plant sample.

## HPLC analysis of pure flavone

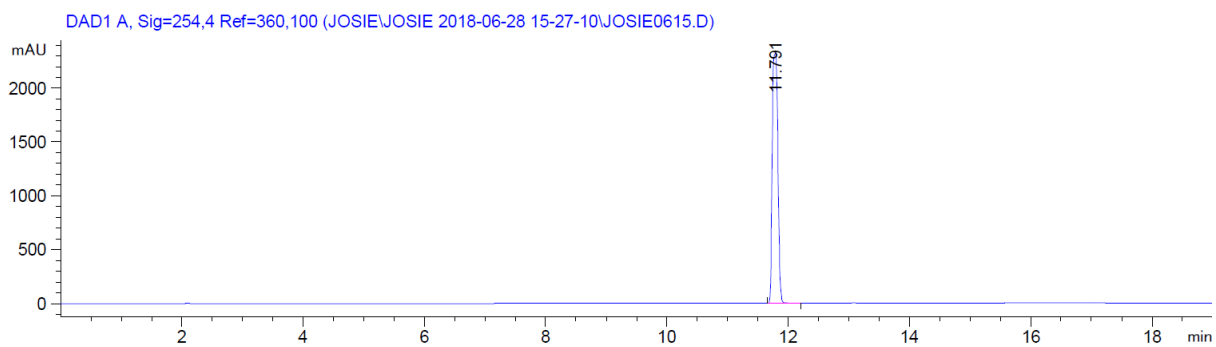

**Figure S4** The HPLC spectra for analysis of pure Flavone using a 5-95% acetonitrile in water gradient.

**NMR comparison of commercially-available flavone and wool fibre**

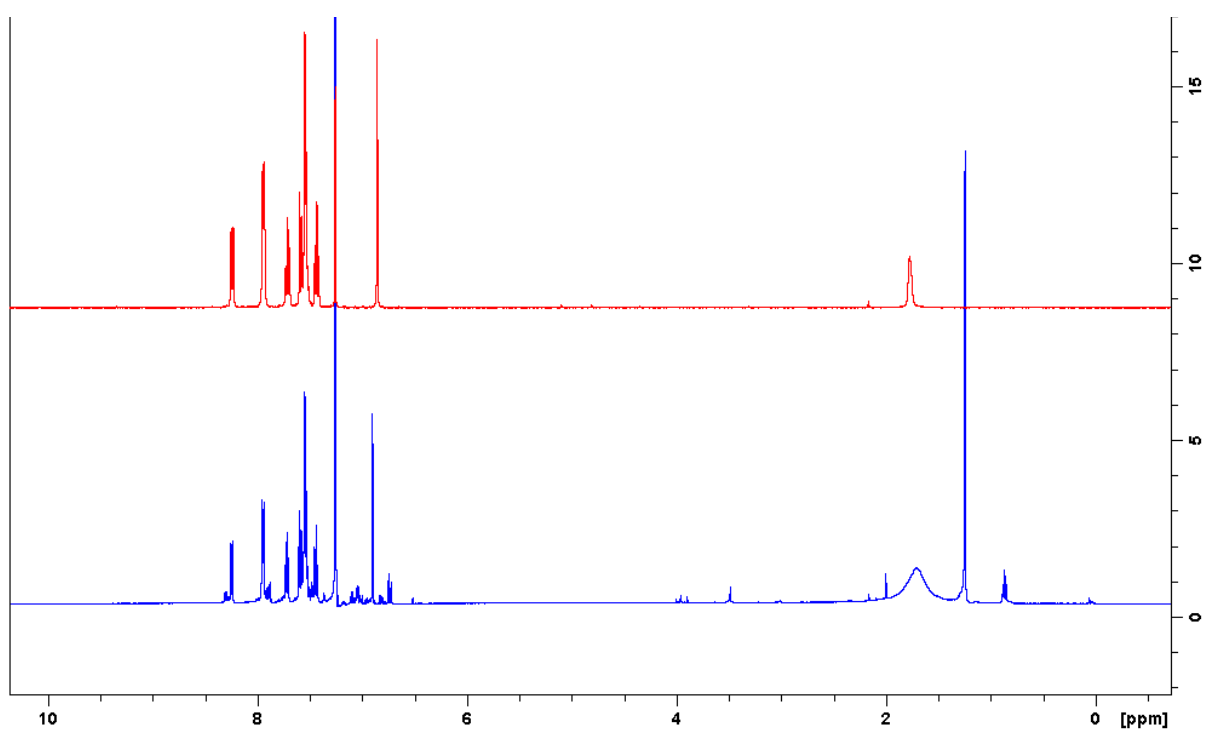

**Figure S5a** A comparison of the  $^1\text{H}$  NMR spectra for a pure sample of flavone (red) and the wool fibre sample (blue) between 10 and 0 ppm.

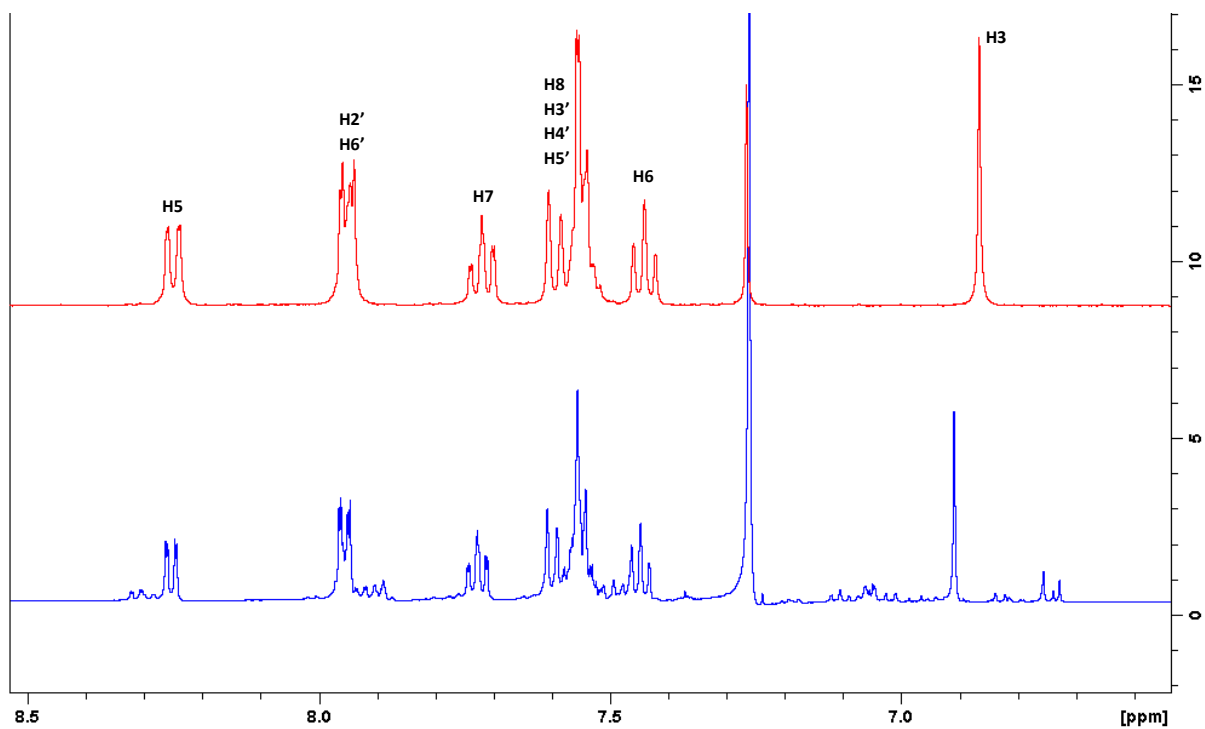

**Figure S5bA** comparison of the <sup>1</sup>H NMR spectra for a pure sample of flavone (red) and the wool fibre sample (blue) between 8.5 and 6.5 ppm.

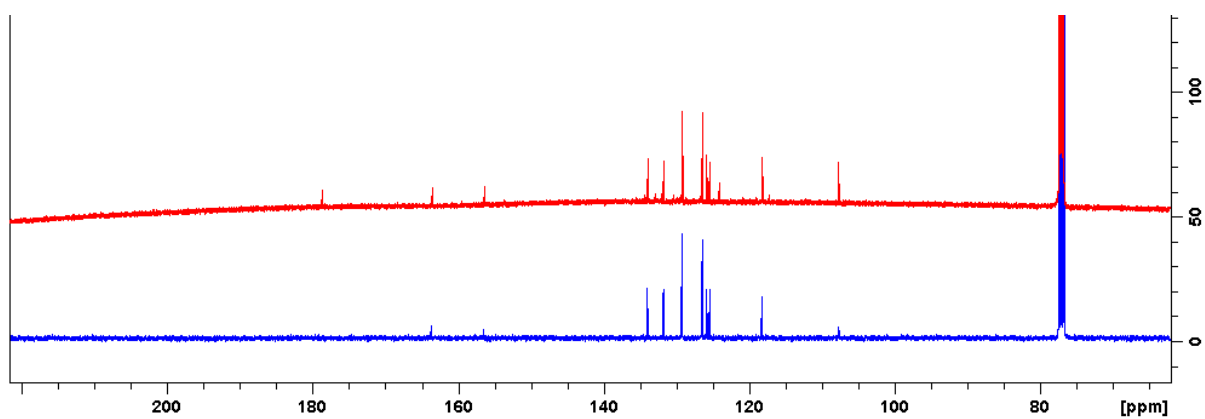

**Figure S5c** A comparison of the <sup>13</sup>C NMR between 220 and 70 ppm for a pure sample of flavone (red) and the wool fibre sample (blue).

### NMR Analysis of wool fibre sample

The sample was analysed using the following NMR experiments:  $^1\text{H}$  NMR (Figure S6a),  $^{13}\text{C}$  NMR (Figure S6b), DEPT 135 (Figure S6c), COSY (Figure S6d), HSQC (Figure S6e) and HMBC (Figure S6f).

The  $^1\text{H}$  and  $^{13}\text{C}$  NMR of pure flavone were compared to the plant sample and the signals were found to match (S5), providing further evidence that the major component of the plant sample mixture is unsubstituted flavone. The NMR assignments are therefore as follows<sup>1,2</sup>:

**$^1\text{H}$  NMR** (500 MHz,  $\text{CDCl}_3$ )  $\delta$  8.26-8.24 (m, 1H, H5), 7.96-7.94 (m, 2H, H2', H6'), 7.74-7.71 (m, 1H, H7), 7.60-7.51 (m, 4H, H8, H3', H4', H5'), 7.46-7.43 (m, 1H, H6), 6.91 (s, 1H, H3)

**$^{13}\text{C}$  NMR** (125 MHz,  $\text{CDCl}_3$ )  $\delta$  178.7 (C, C4), 163.6 (C, C2), 156.5 (C, C9), 134.0 (CH, C7), 131.9 (C, C1'), 131.8 (CH, C3', C5'), 129.2 (CH, C4'), 126.5 (CH, C2', C6'), 125.9 (CH, C5), 125.4 (CH, C6), 124.1 (C, C10), 118.3 (CH, C8), 107.8 (CH, C3)

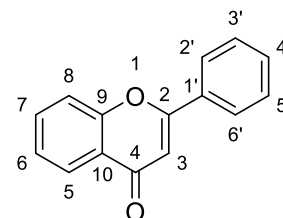

<sup>1</sup> B.-H. Moon, Y. Lee, C. Shin, Y. Lim, Complete Assignments of the  $^1\text{H}$  and  $^{13}\text{C}$  NMR Data of Flavone Derivatives, *Bull. Korean Chem. Soc.* **26** (4), 603-608 (2005)

<sup>2</sup> D. W. Aksnes, A. Standnes, Ø. M. Andersen, Complete Assignment of the  $^1\text{H}$  and  $^{13}\text{C}$  NMR Spectra of Flavone and its A-Ring Hydroxyl Derivatives, *Magnetic Resonance in Chemistry* **34**, 820-823 (1996)

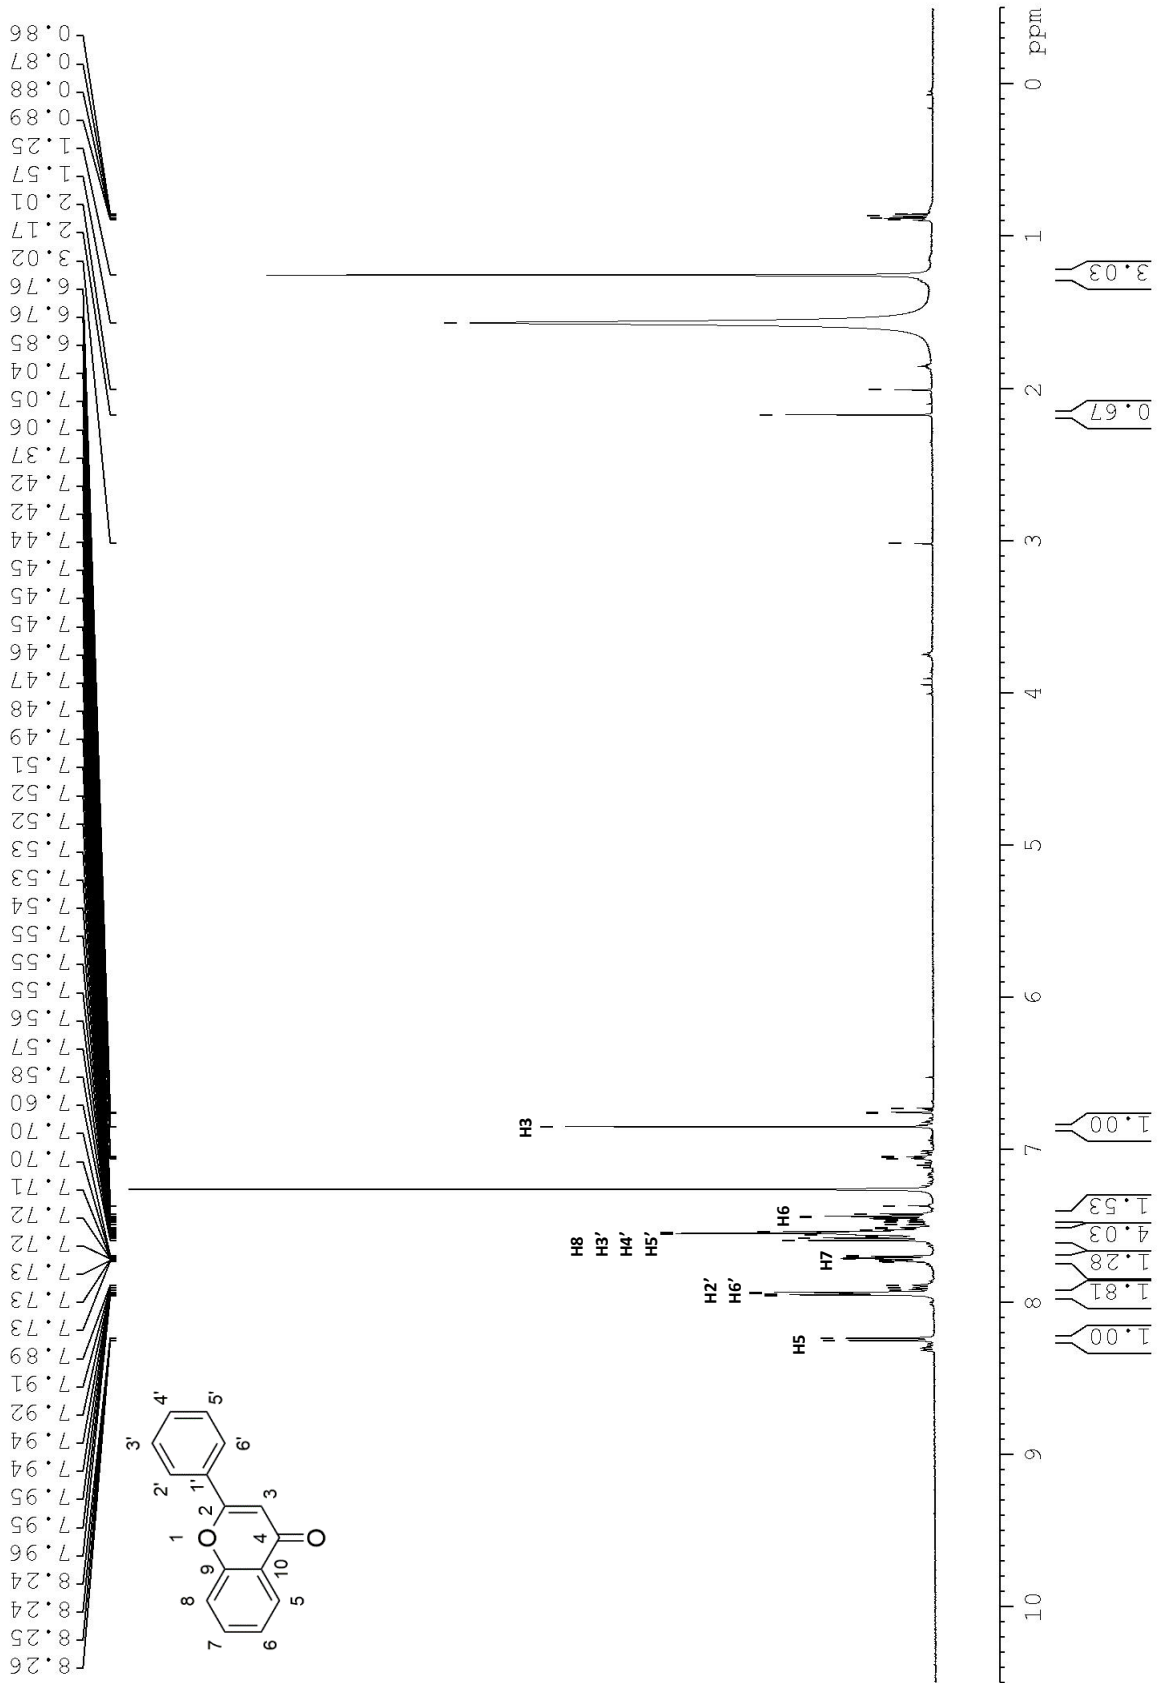

**Figure S6a** The assigned  $^1\text{H}$  NMR spectrum of the plant sample.

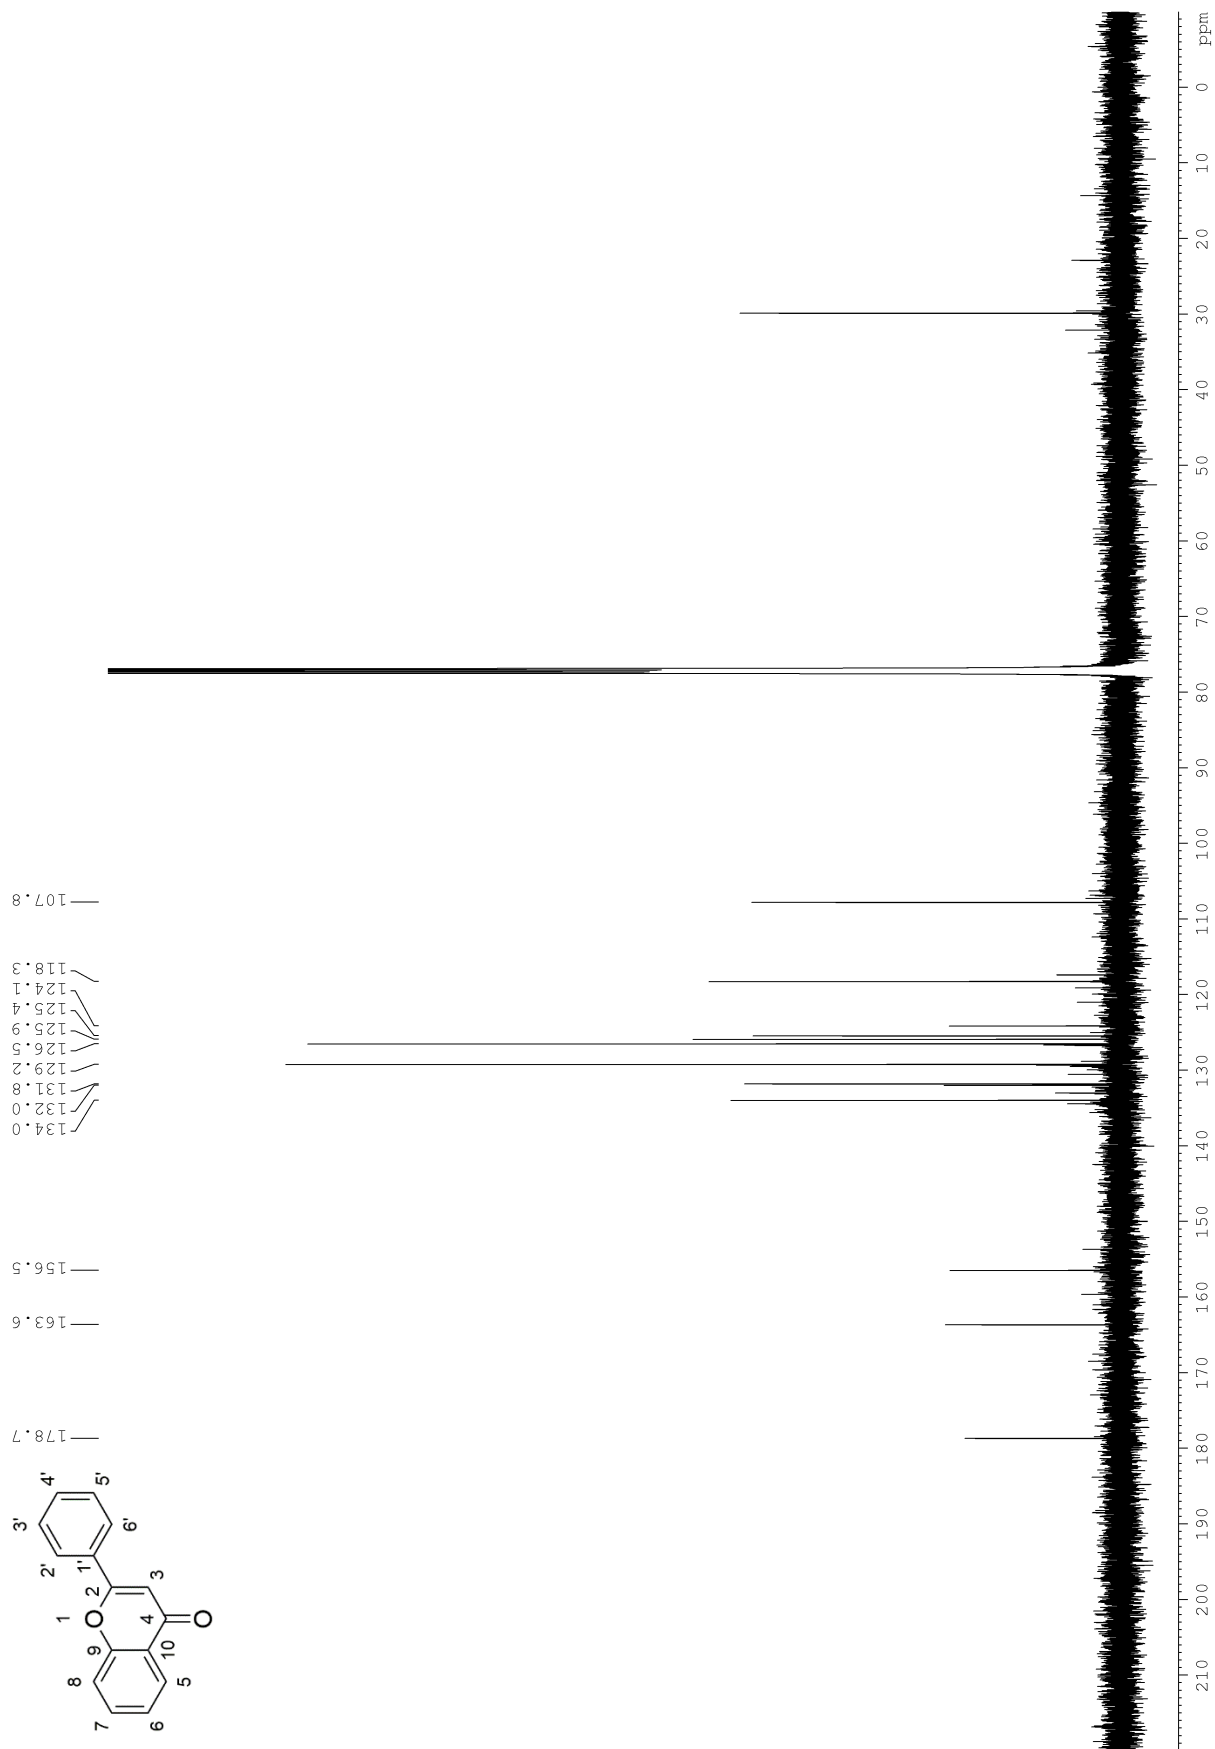

**Figure S6b** The  $^{13}\text{C}$  NMR spectrum of the plant sample



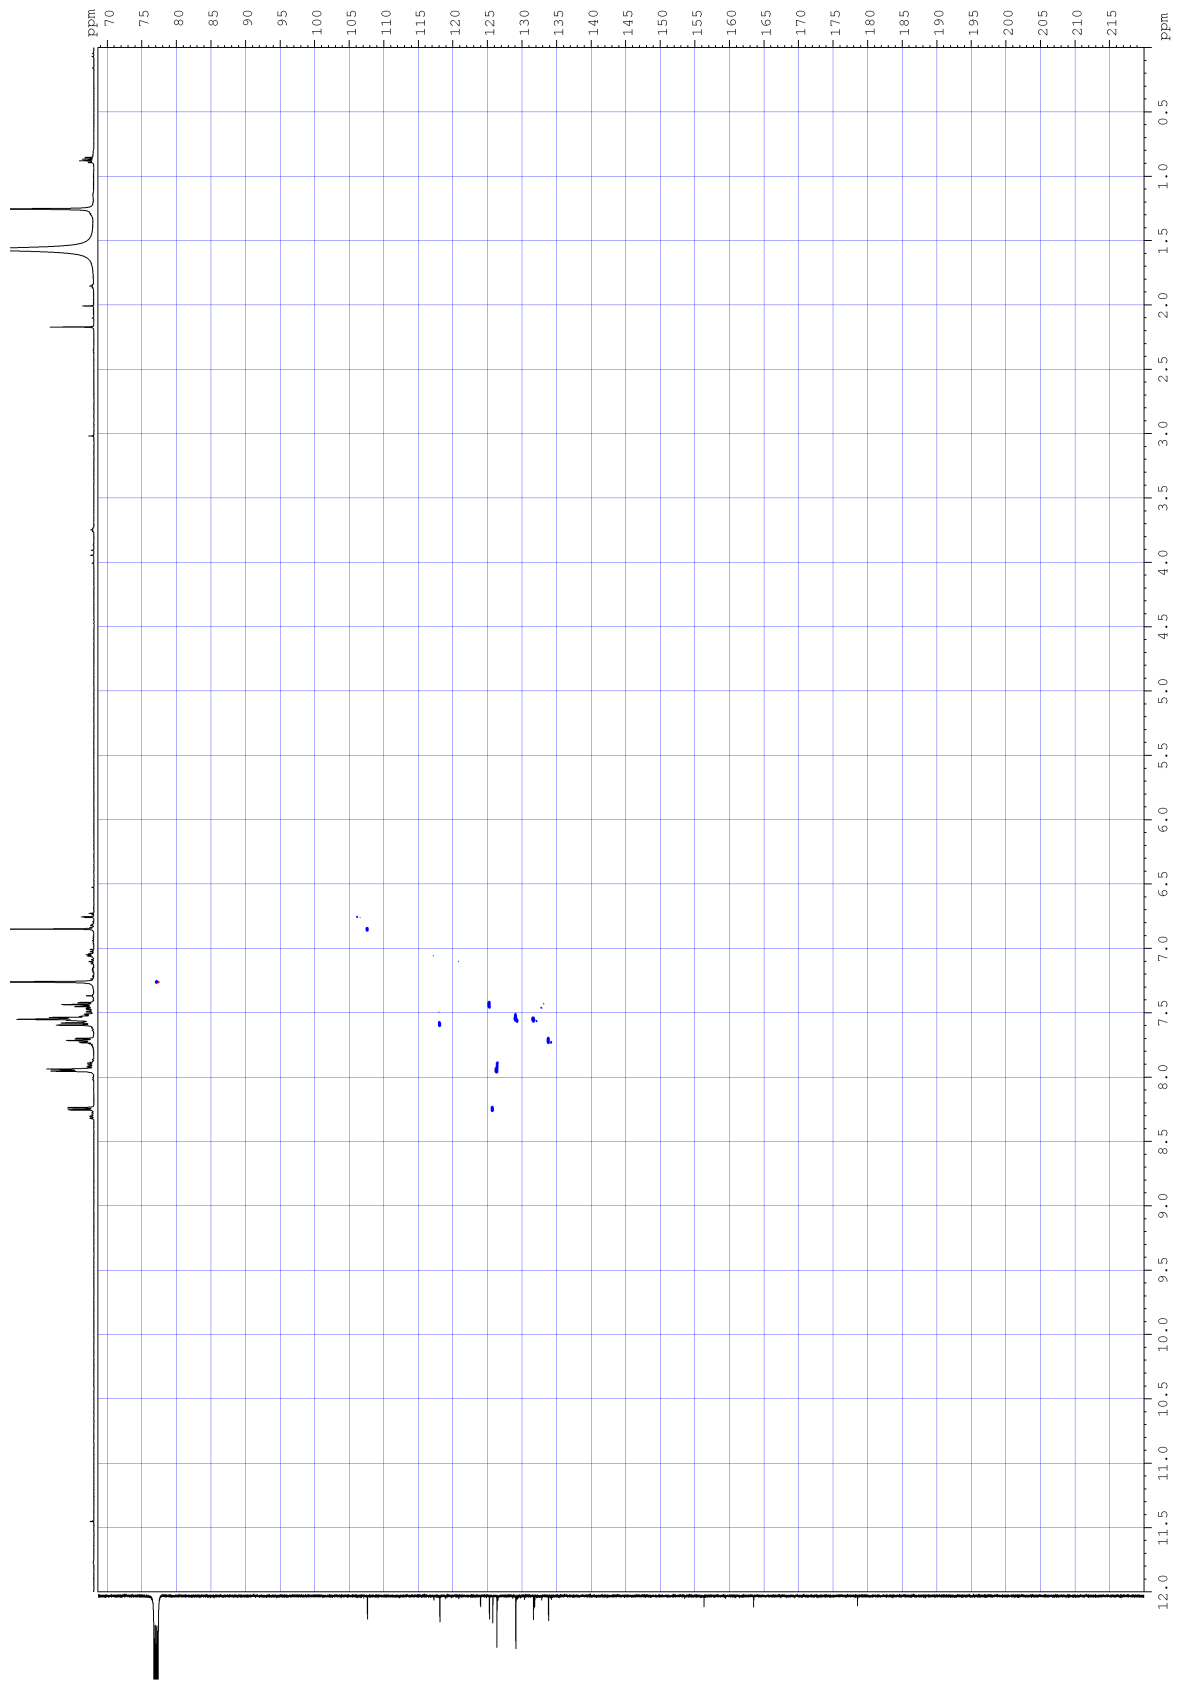

**Figure S6d** The HSQC spectrum of the plant sample



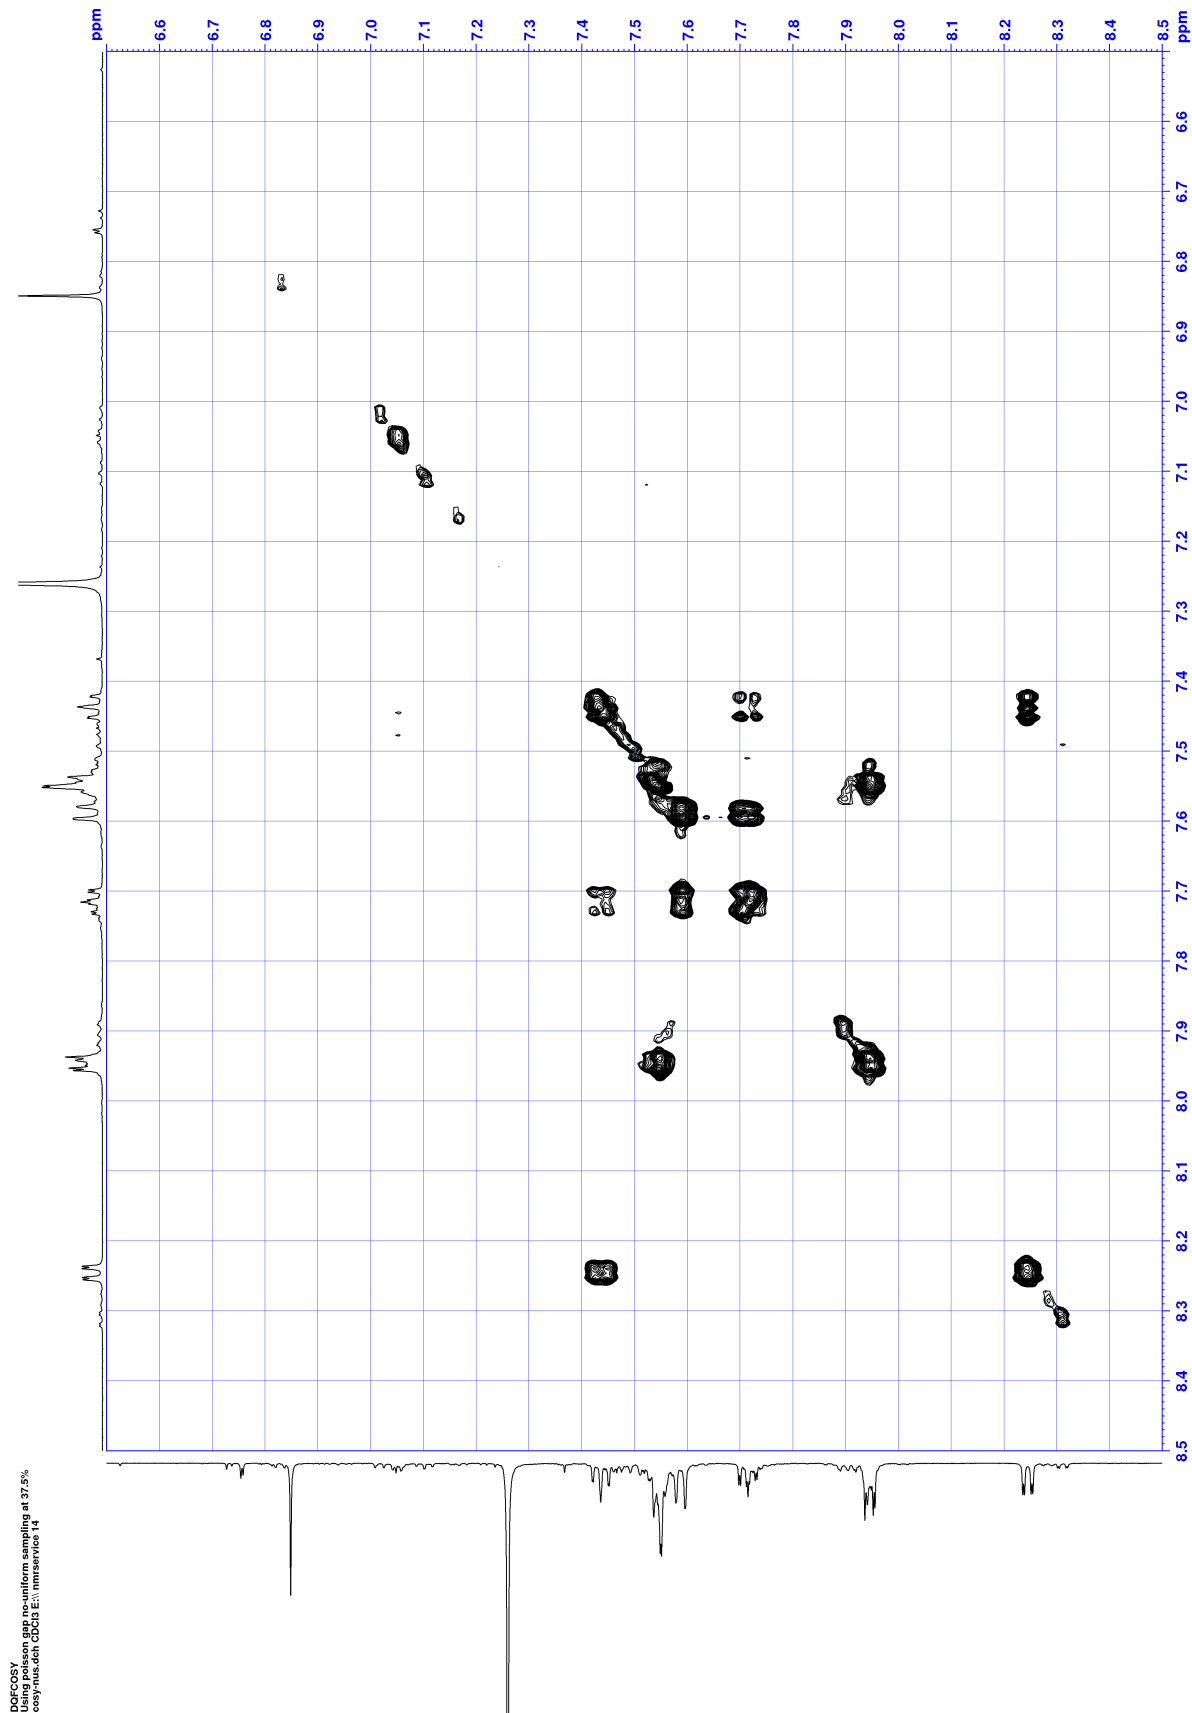

Figure S6e The COSY spectrum of the plant sample

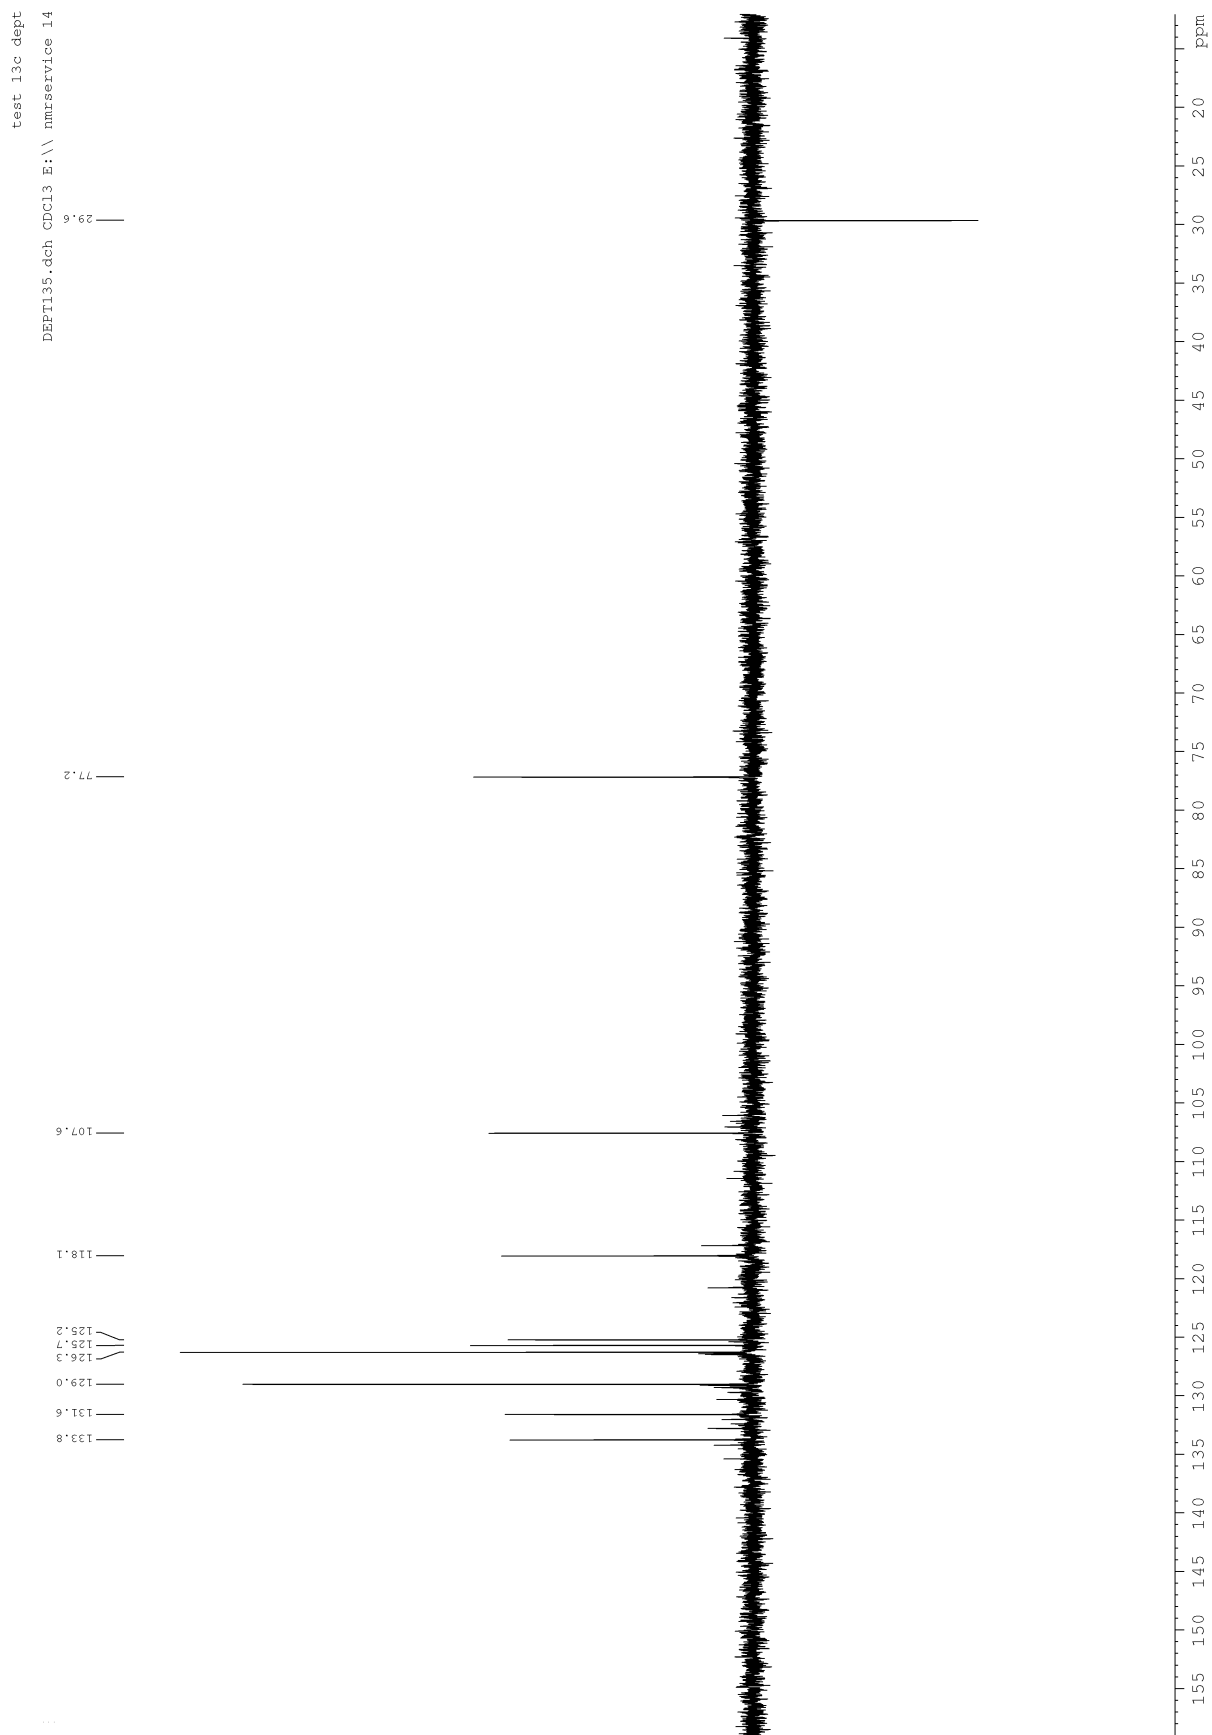

**Figure S6f** The DEPT 135 spectrum of the plant sample

## 2D NMR experiments to investigate substitution patterns on flavones

To investigate the structure of the minor species present in the wooly farina sample, a HSQC experiment was run with non-uniform sampling to increase the resolution of the spectrum (Figures S7a and S7b).

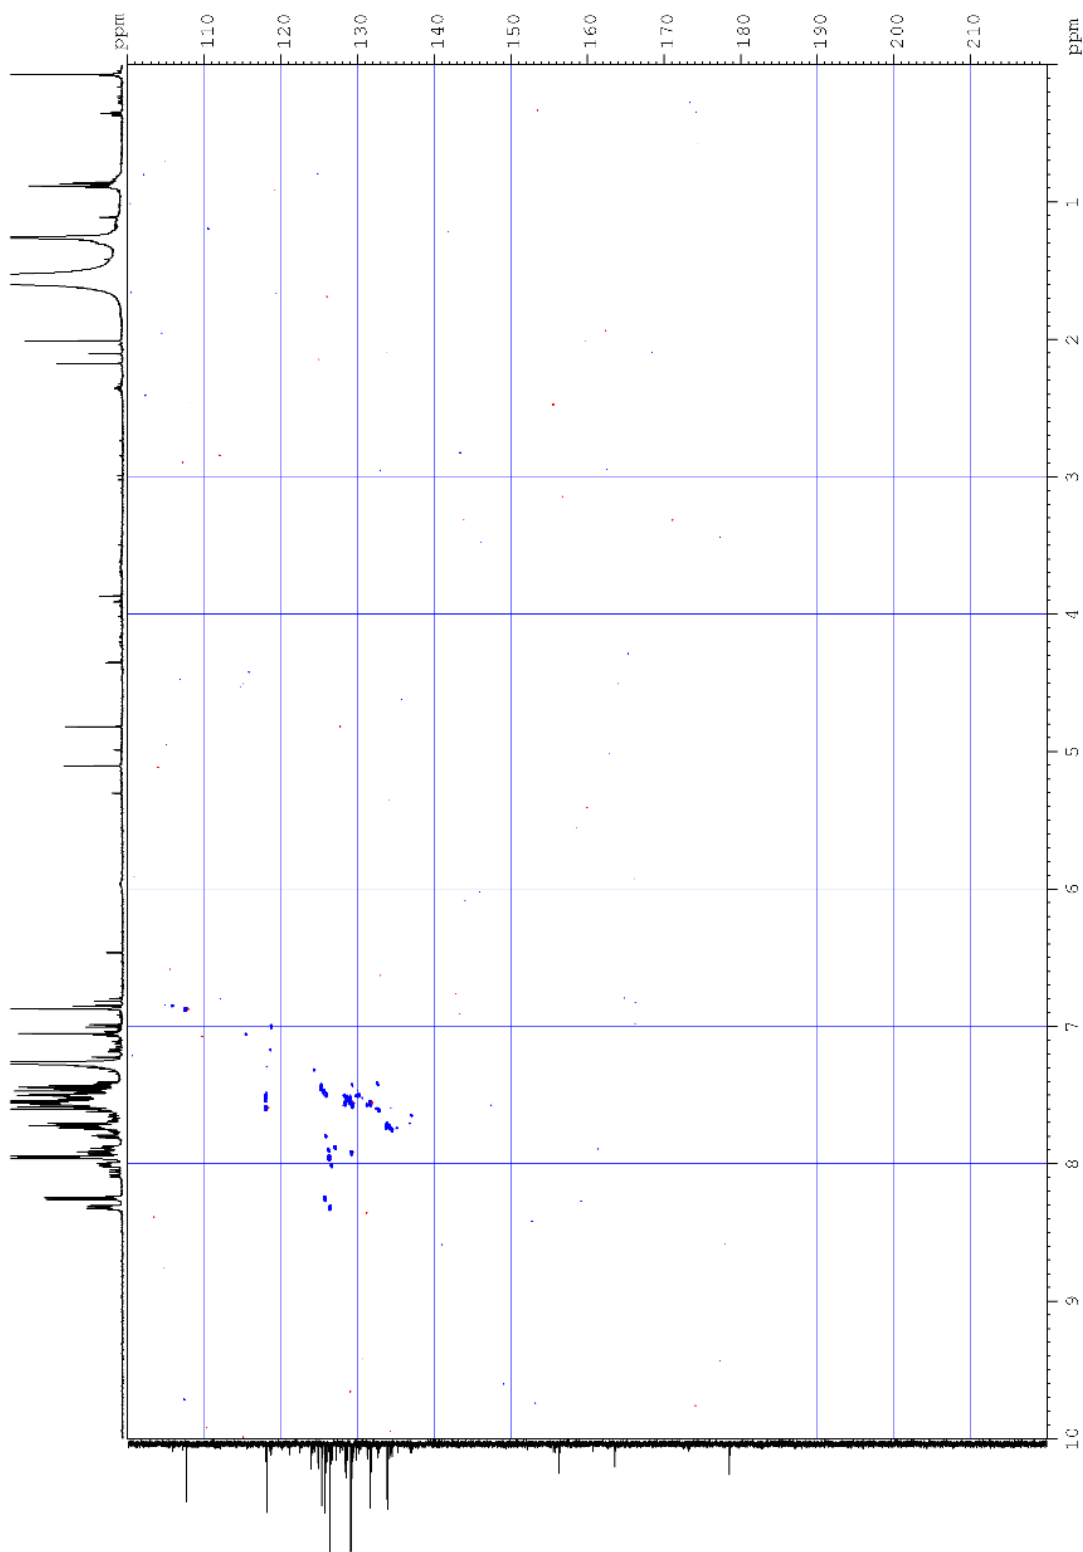

Figure S7a The spectrum of the HSQC experiment (run with non-uniform sampling).

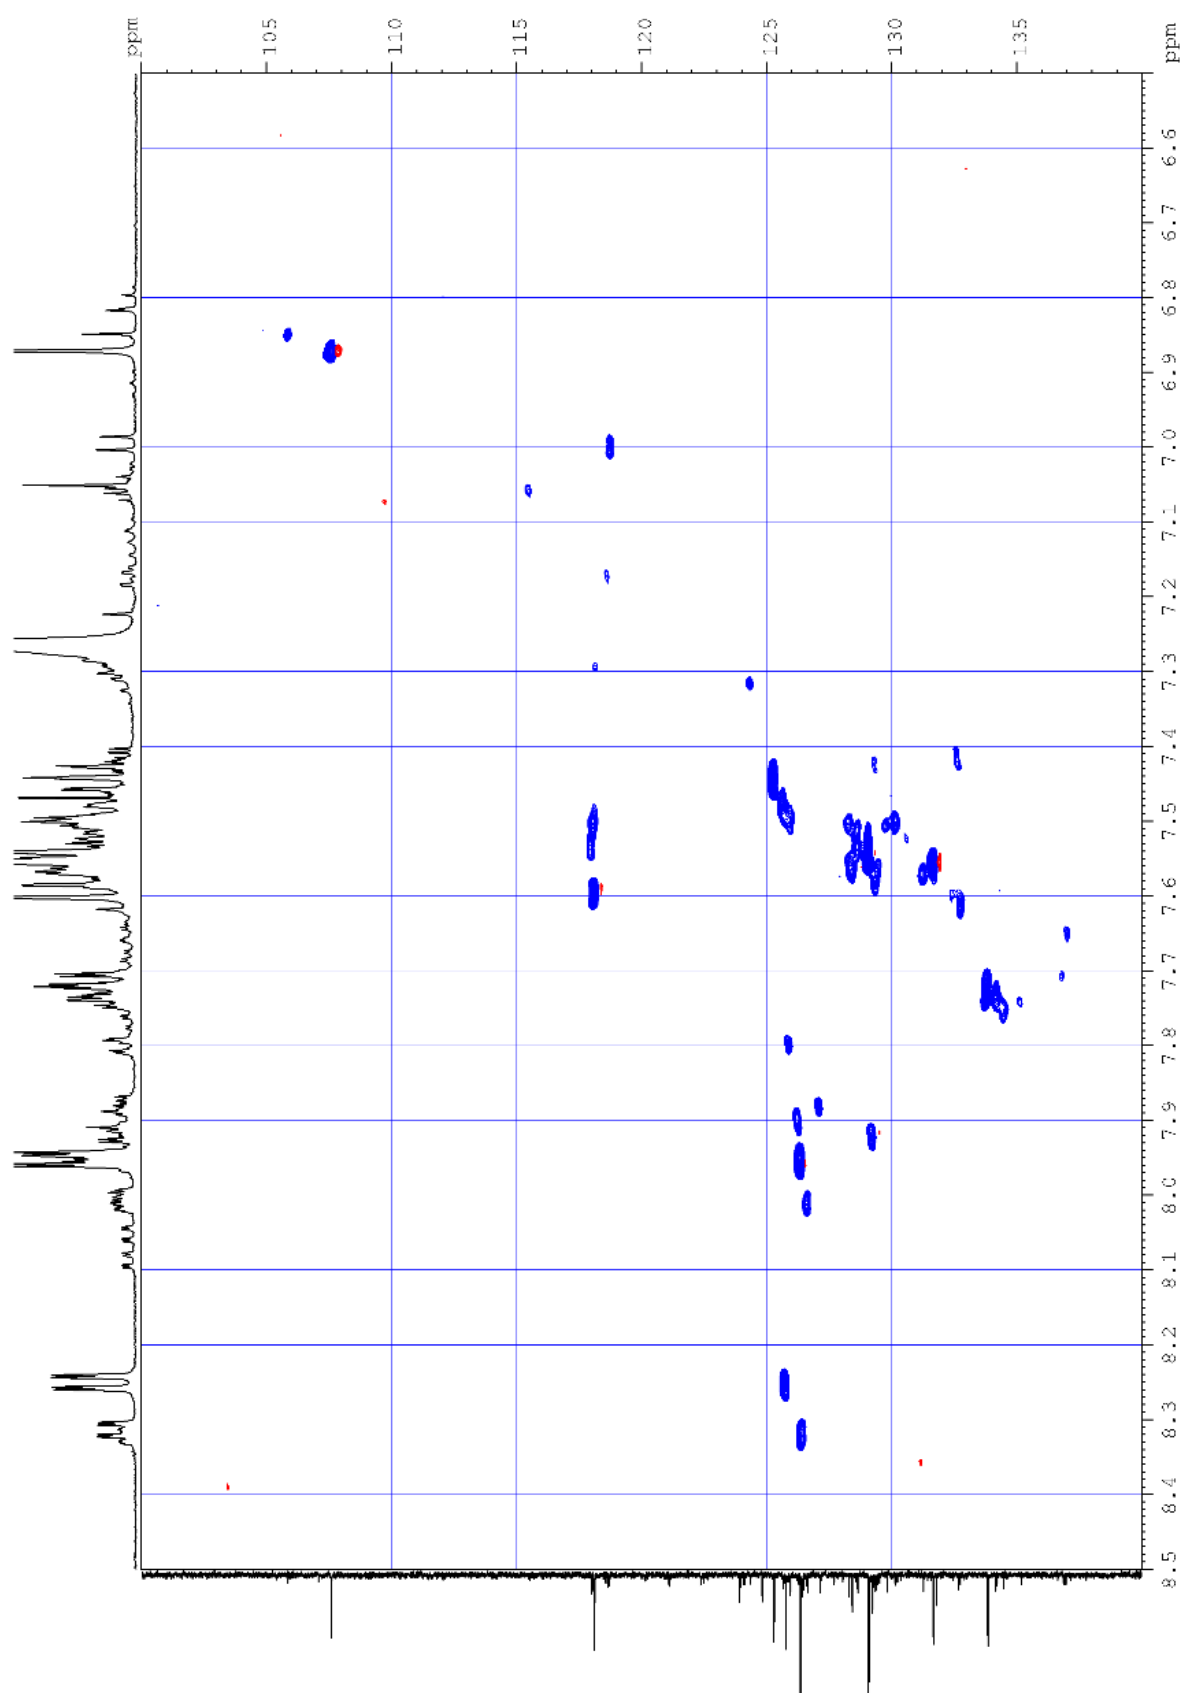

**Figure S7b** A zoomed in section of the aromatic region of the HSQC experiment (run with non-uniform sampling).

Without NMR, LCMS, HRMS and HPLC analysis of the isolated components of the plant sample mixture, the structure of the minor species cannot be stated with 100% confidence. However with the data from the LCMS, HPLC, HRMS and NMR, suggestions can be made.

The masses from the LCMS indicated that mono-hydroxy or mono-methoxyflavones were present in the woolly farina sample. Literature values for carbon atoms bearing a hydroxy or methoxy substituent in flavones are very similar and signals are present at 3.9-4.0 ppm in the  $^1\text{H}$  NMR spectrum which could correlate to the methyl group of a methoxy substituent, however with the NMR data available it could not be confirmed if methoxy-substituted flavones were present.

For hydroxy substitution, each potential substitution site was considered in turn. The expected shifts of the protons and carbons with hydroxy-substitution were based on literature values<sup>3,4</sup>. From the information provided by the HSQC experiment, the most likely substitution pattern is 4'-hydroxyflavone:

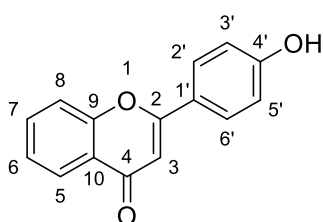

The evidence for this is as follows:

A signal is present in the  $^{13}\text{C}$  NMR spectrum at 160.7 ppm which is in the correct region for the quaternary C4' carbon with either a hydroxyl substitution (Figure S7c).

Correlation is observed in the HSQC between a  $^{13}\text{C}$  signal at 127.1 ppm and a  $^1\text{H}$  signal at 7.88 ppm (A, Figure S7d). These match the expected shifts for an aromatic CH in a meta position to the hydroxylation site (i.e. the CH at either C2' or C6').

Correlation is observed between a  $^{13}\text{C}$  signal at 118.6 ppm and a  $^1\text{H}$  signal at 7.16 ppm (B, Figure S7d) which match the expected shifts for an aromatic CH in an ortho position relative to the hydroxyl group (i.e. the CH at C3' or C5').

---

<sup>3</sup> D. H. Williams, I. Fleming, *Spectroscopic Methods in Organic Chemistry* (McGraw-Hill Companies, ed. 5, 1996)

<sup>4</sup> Y. Park, B.-H. Moon, E. Lee, Y. Lee, Y. Yoon, J.-H. Ahn, Y. Lim, *Magn. Reson. Chem.* **45**, 674–679 (2007)

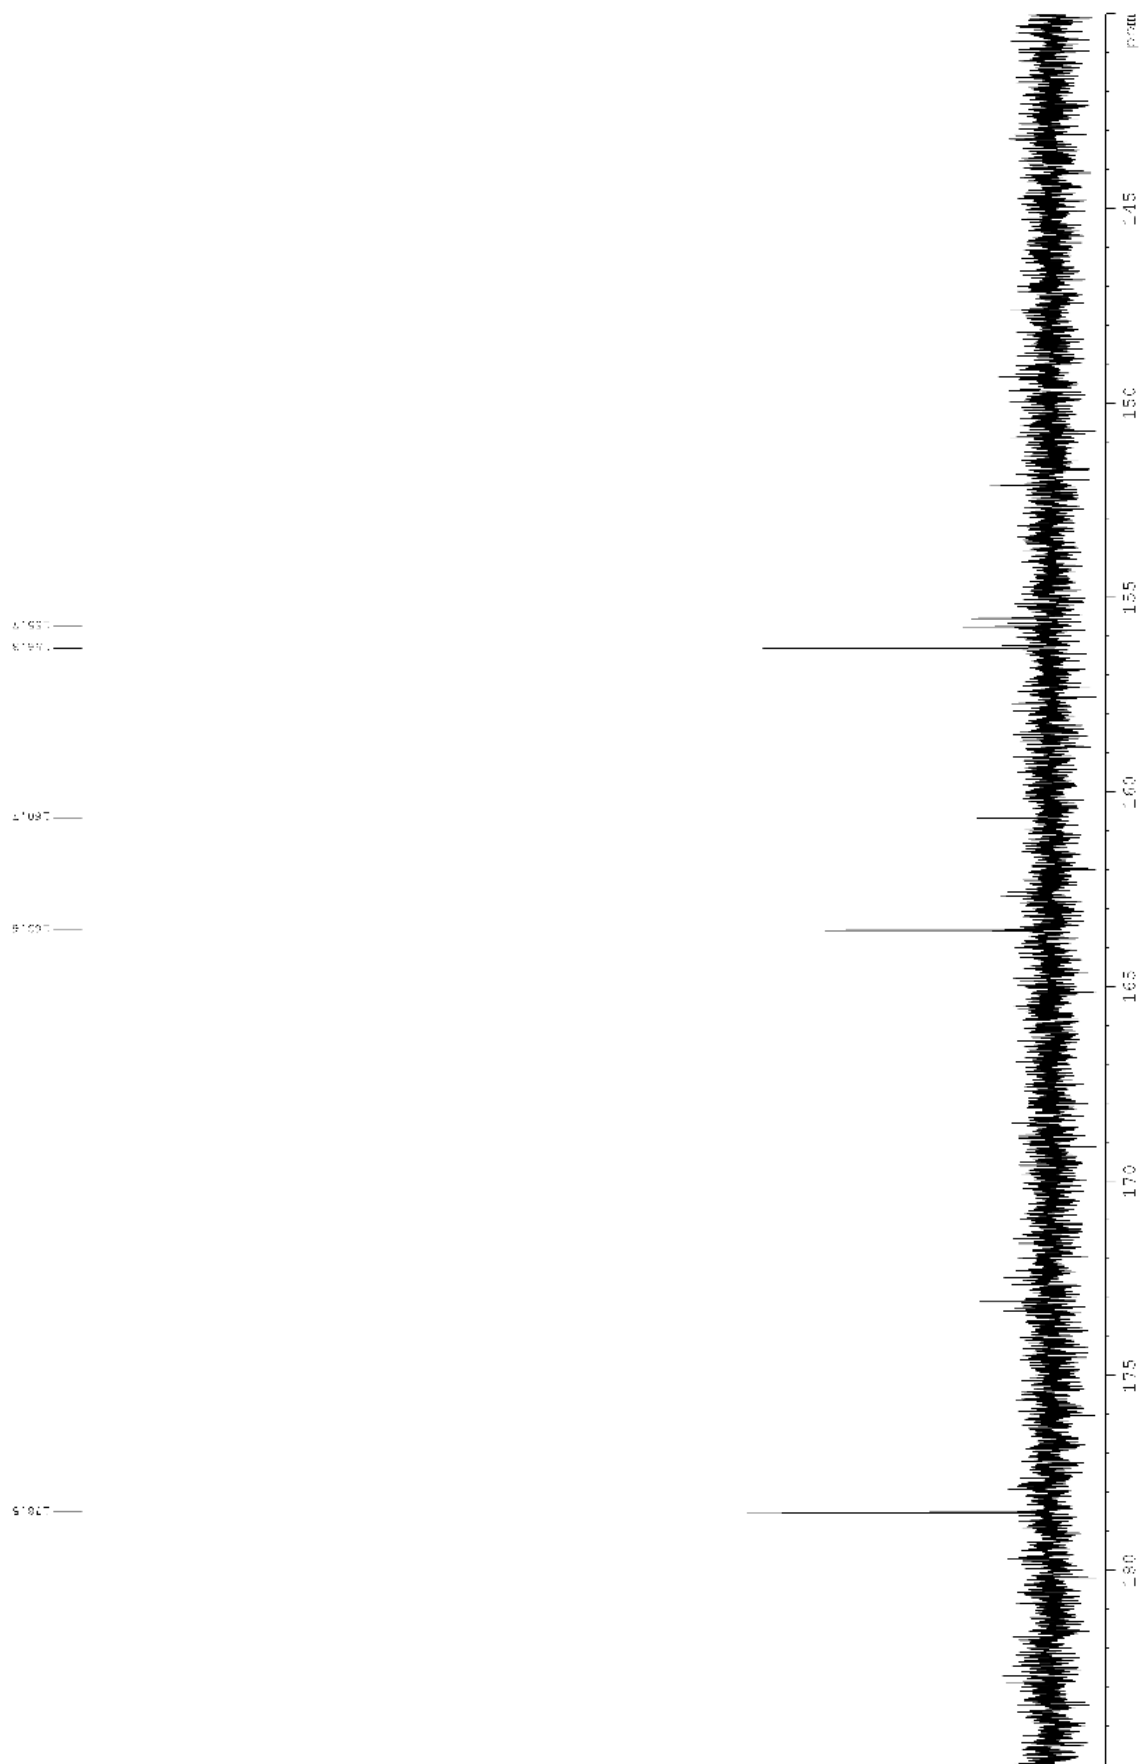

**Figure S7c** The  $^{13}\text{C}$  NMR spectrum showing the peak at 160.3 ppm

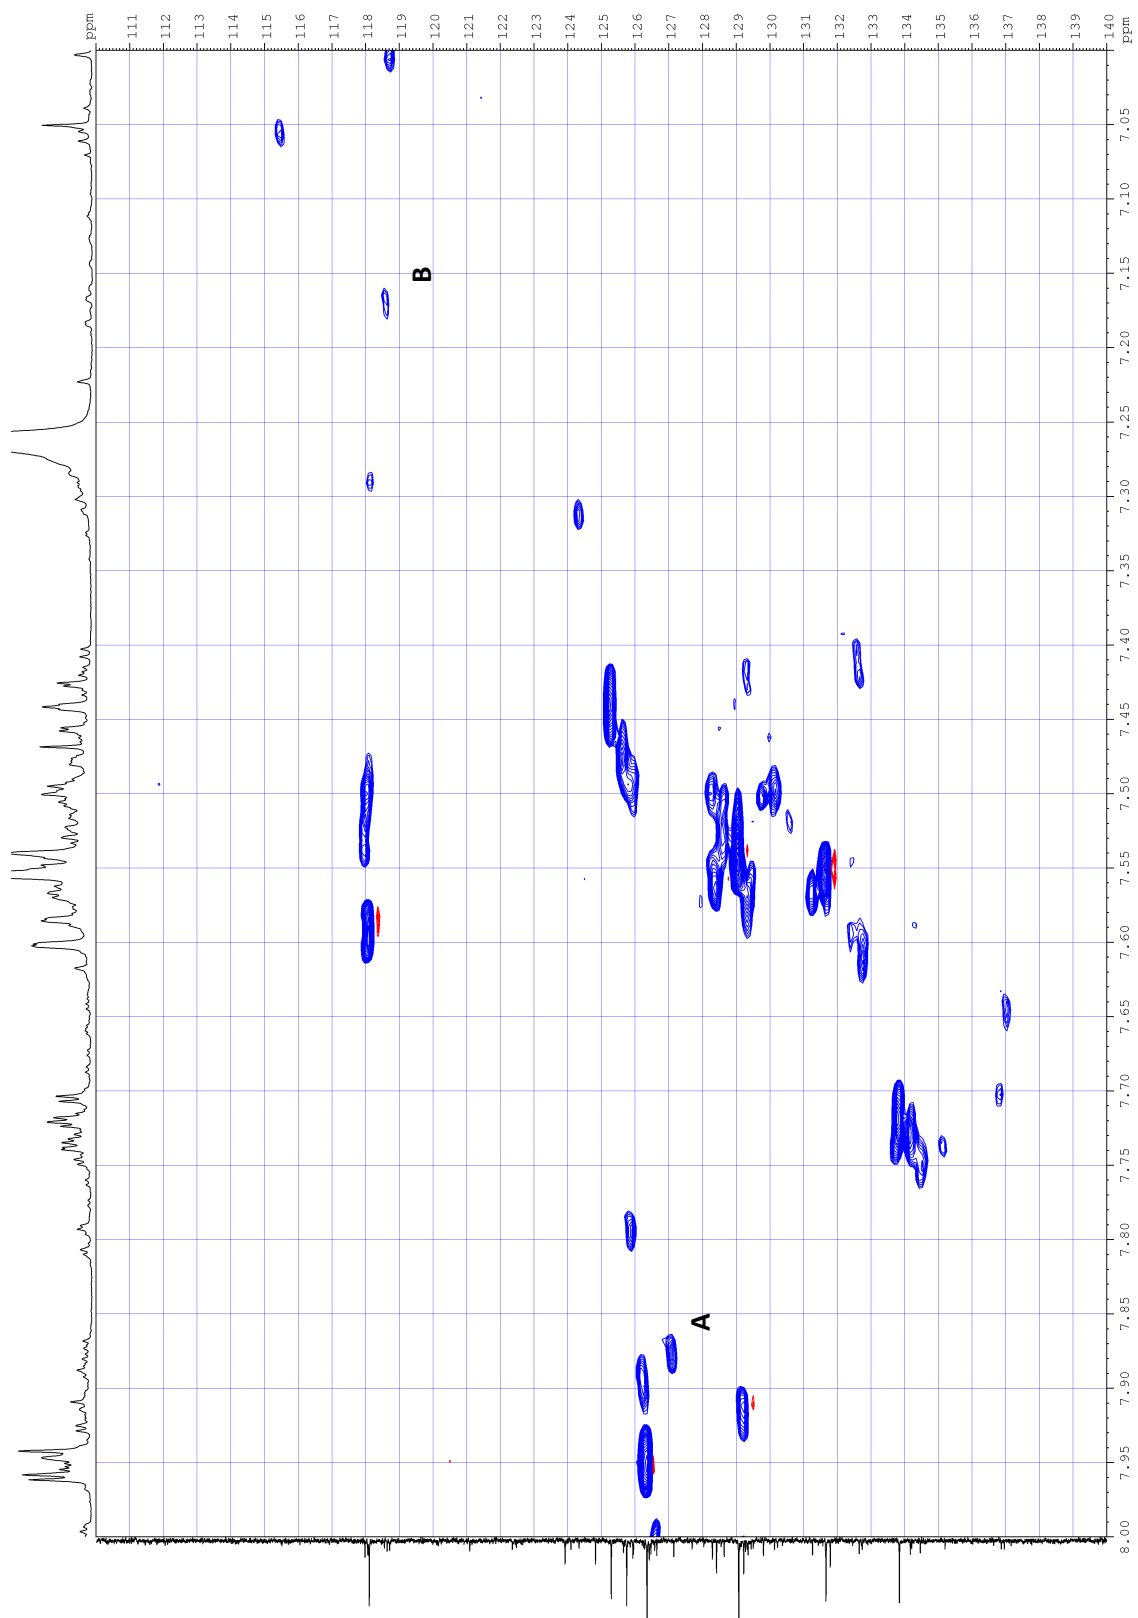

**Figure S7d** A zoomed in region of the HSQC (with non-uniform sampling) showing the two correlations A and B.

As the LCMS data indicated there were two mono-hydroxylated species with different retention times present in the plant sample, there could be another isomer present. The NMR data point towards this being 2'-hydroxyflavone:

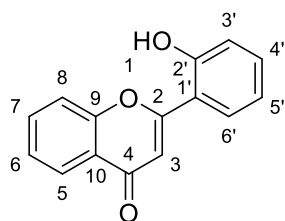

The evidence for this includes:

In the  $^{13}\text{C}$  NMR spectrum there is a peak at 152.1 ppm, which is around the expected shift for the quaternary C2' bearing the hydroxyl group (Figure S7e).

In the HSQC experiment with non-uniform sampling, a peak at 132.6 ppm in the  $^{13}\text{C}$  NMR correlates with a peak at 7.41 ppm in the  $^1\text{H}$  NMR (A, Figure S7f). These shifts match the expected signal for an aromatic CH which is in a meta position relative to the hydroxyl (i.e. the signal for H4')

In the HSQC experiment with non-uniform sampling, a peak at 124.3 ppm in the  $^{13}\text{C}$  NMR correlates with a peak at 7.31 ppm in the  $^1\text{H}$  NMR (B, Figure S7f). These shifts match the expected signal for an aromatic CH which is in a para position to the hydroxyl group (i.e. for C5').



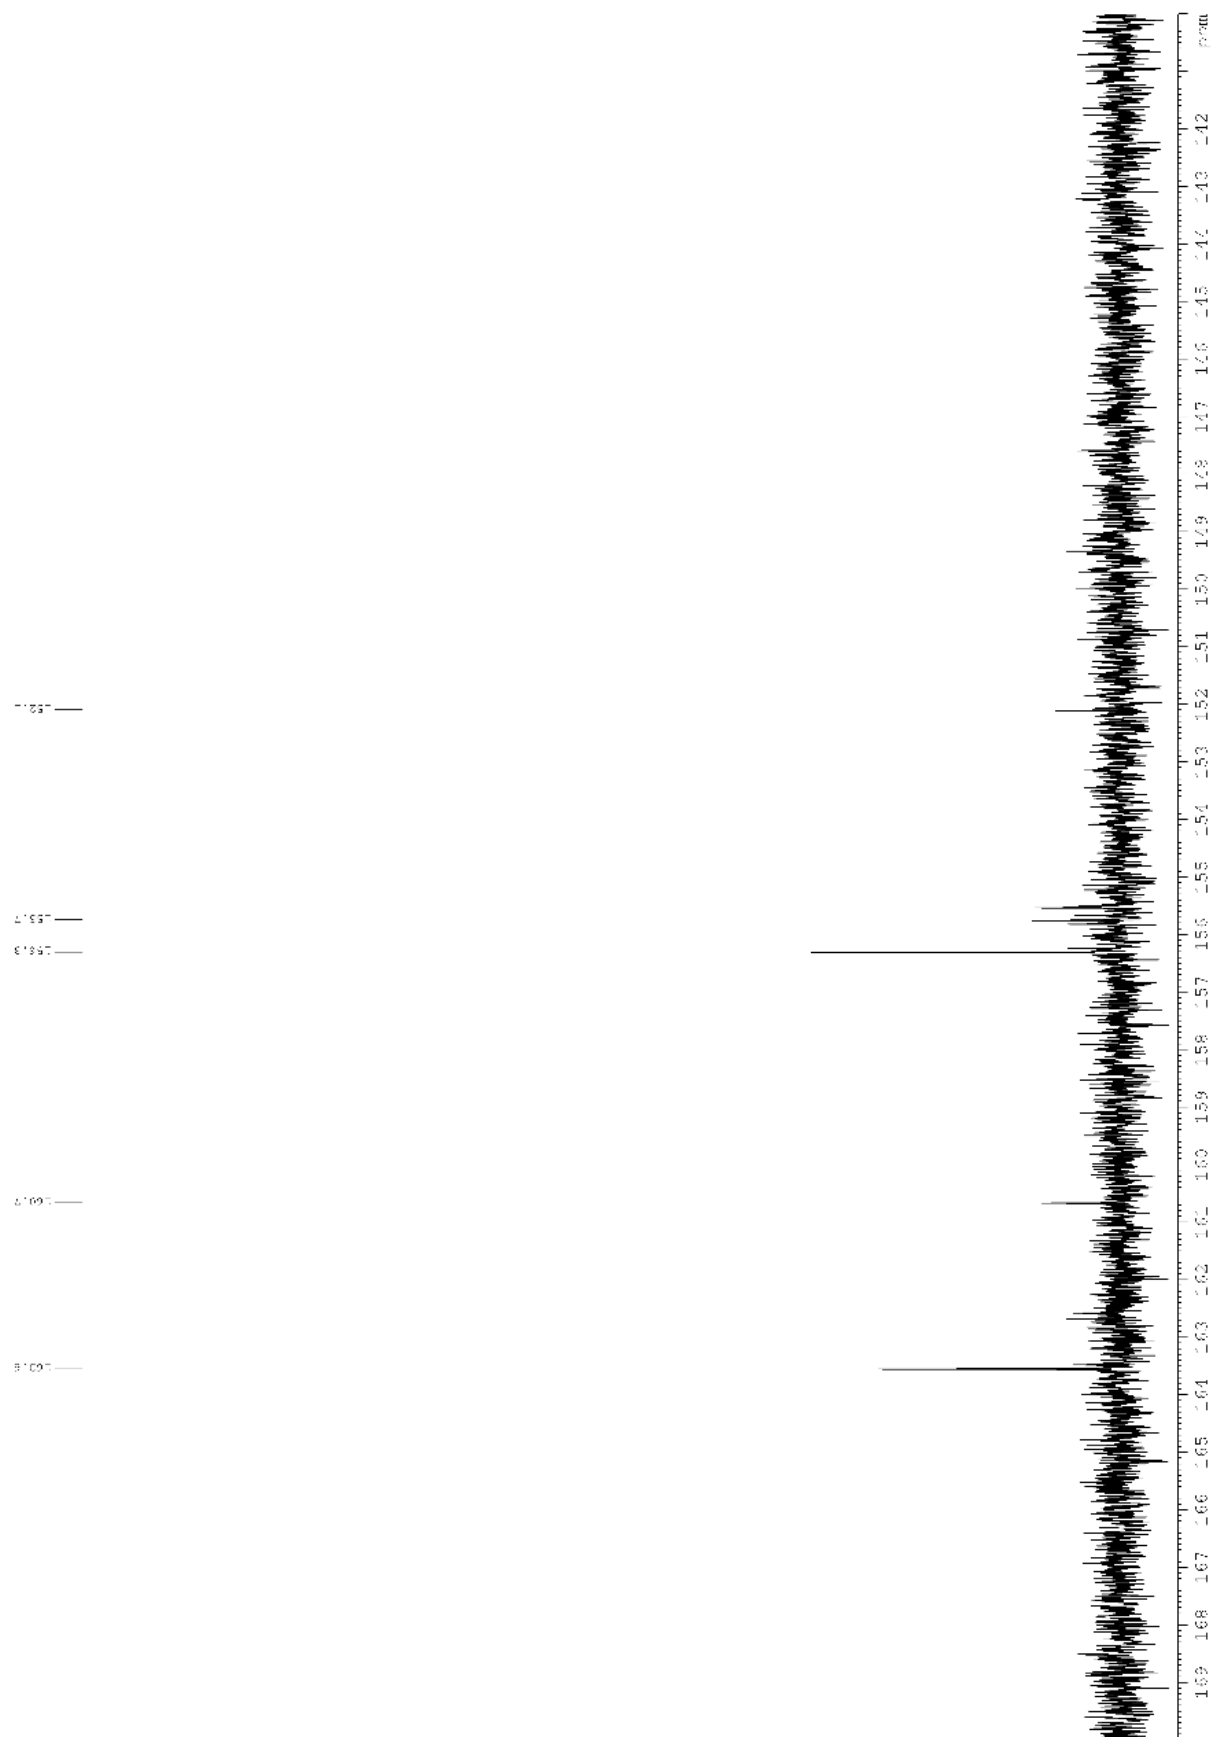

**Figure S7e** A zoomed in region of the HSQC (with non-uniform sampling) showing the two correlations A and B.

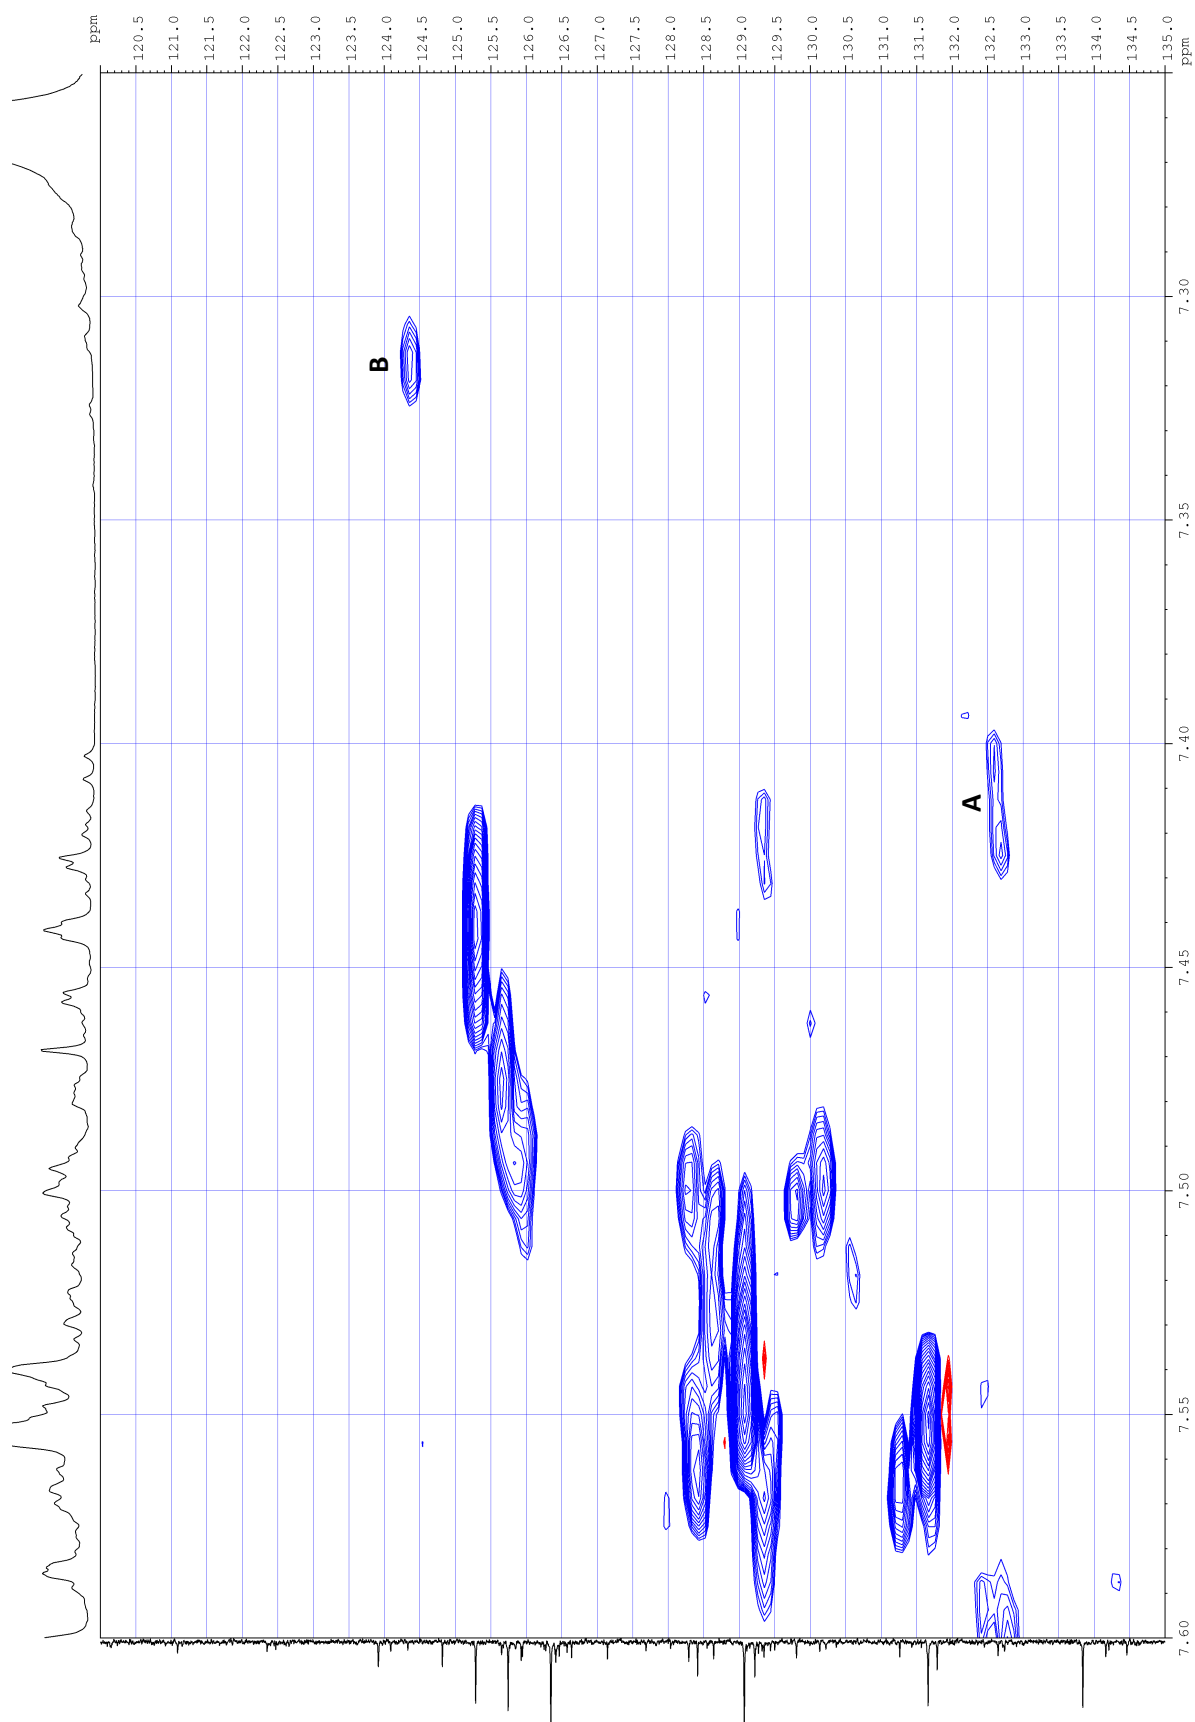

**Figure S7f** A zoomed in region of the HSQC (with non-uniform sampling) showing the two correlations A and B.

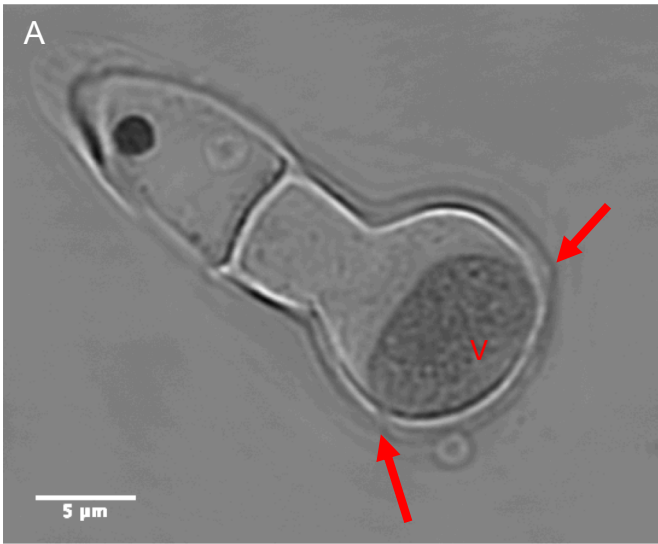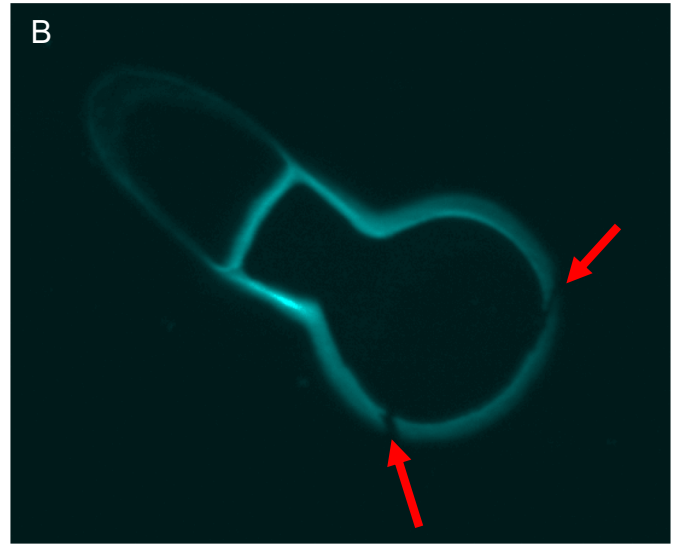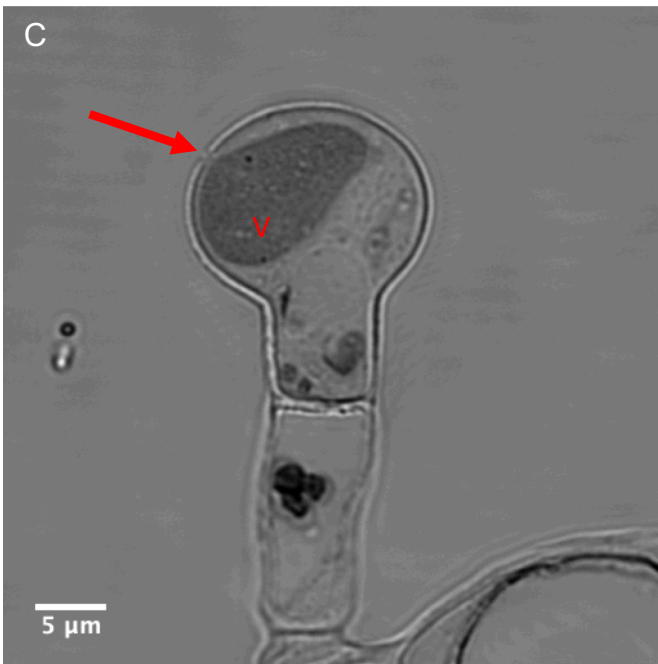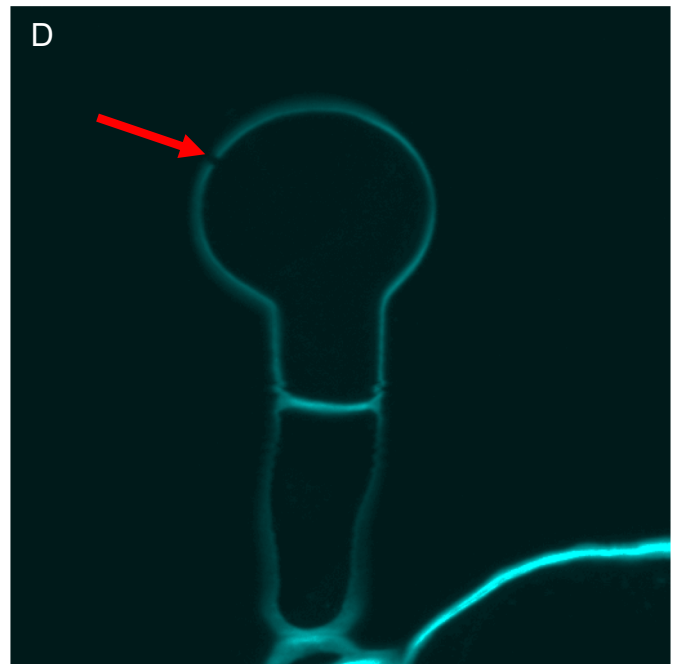

**Figure S8.** Confocal transmitted image (A, C) and cell wall fluorescence (B, D) of calcofluor-stained sections through gland hair cells. Wool exit holes, observed as discrete gaps in the fluorescence images (arrows) are in close proximity to the dense vacuole (V).

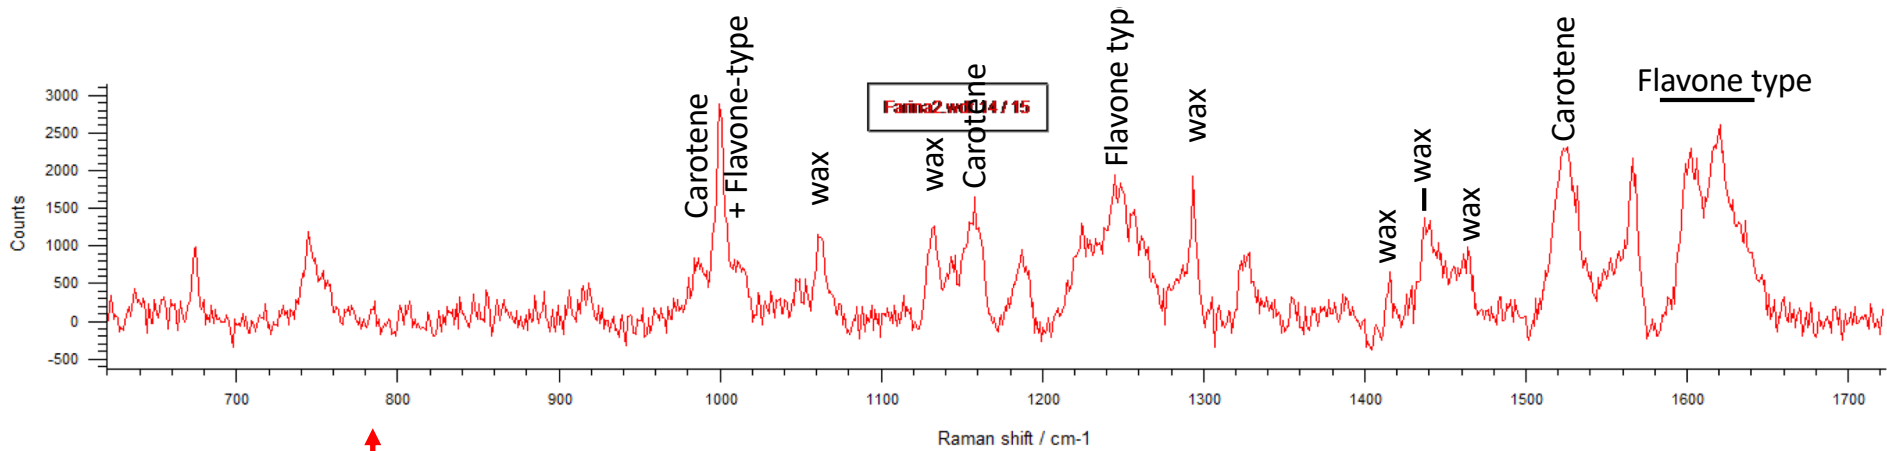

FLIM:

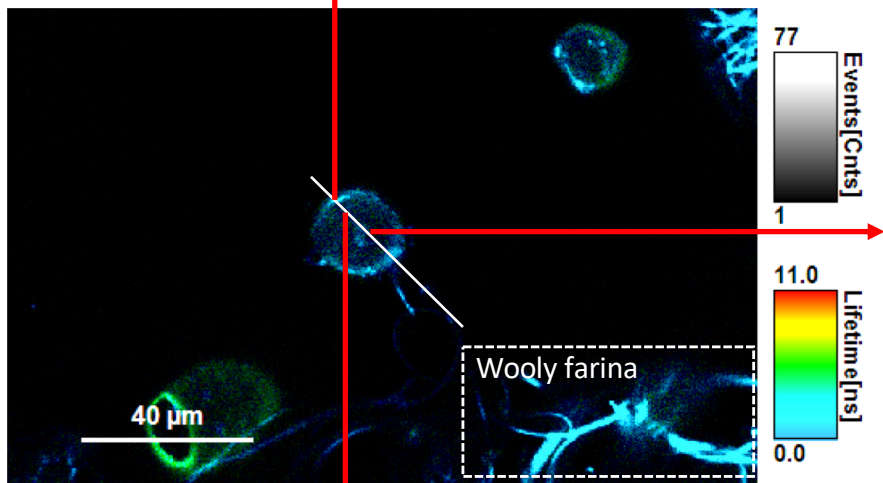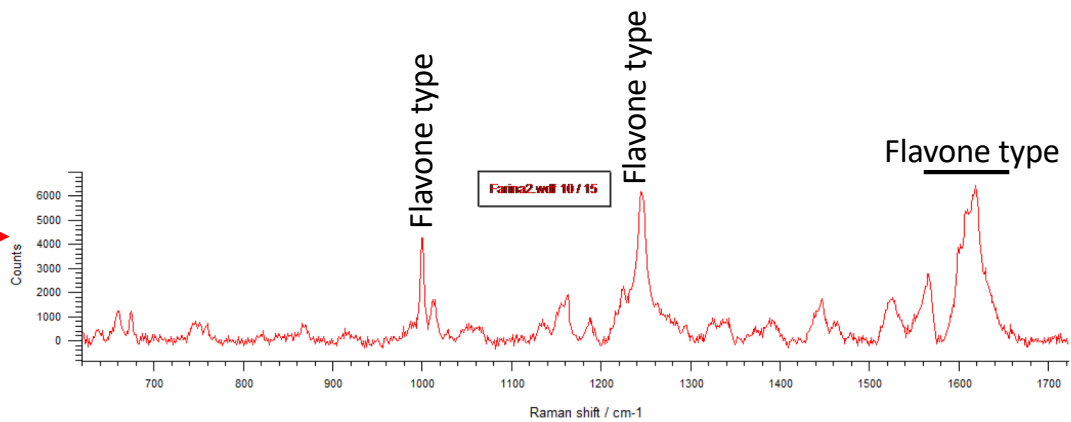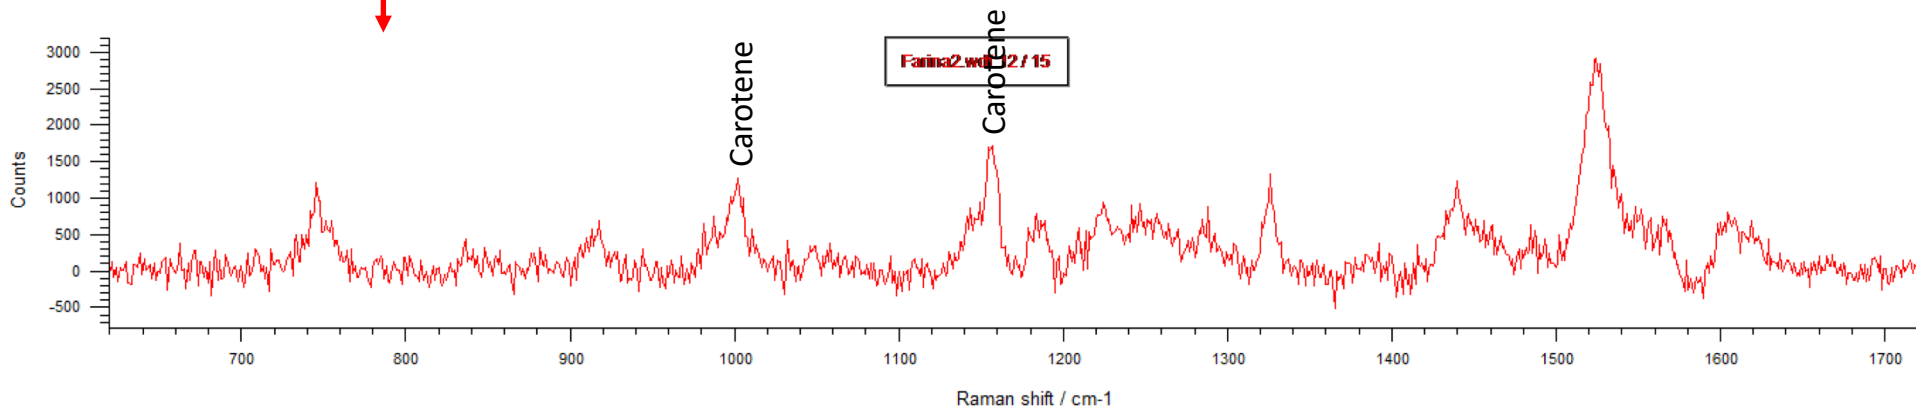

**Figure S9.** Fluorescence Lifetime Imaging (FLIM) of glandular trichomes taken together with Raman spectra acquired along a line through a trichome cell. The FLIM data (centre left image) represents lifetimes of autofluorescence. Farinose material including the wool and edge of the trichome cell have short lifetimes (cyan and blue colours) with high signal and the cell interior has blue (short) and green (long) lifetimes with low signal. Raman measurements at precise locations along the line confirm the presence of flavone-type material at the cell edge together with strong peaks equivalent to those of plant epicuticular wax (Upper spectrum, assignments are given for prominent peaks). Note the intense cyan labelling in the FLIM image that is a similar lifetime to the wooly farina (white boxed region). Within a proximal location inside the cell there is an absence of the the wax-associated peaks and the strong flavone peaks (lower spectrum). Carotenoid is detected at both locations. Another location inside the cell yielded strong flavone peaks (centre spectrum) and may represent an intracellular store of flavones.
